# Supplementary material for: Platelet Inventory Management with Approximate Dynamic Programming
Source: Atypon-hosted journal article supplement (doi:10.1287/ijoc.2023.0245), 2025-03-11
Supplement: ijoc.2023.0245.cd.zip [file Figure 9.pdf › 2023.0245-master/results/Figure 9.pdf]

Relative Gap (%)

Deterministic

Exogenous-ADP   Exogenous-Empirical   Exogenous-Myopic

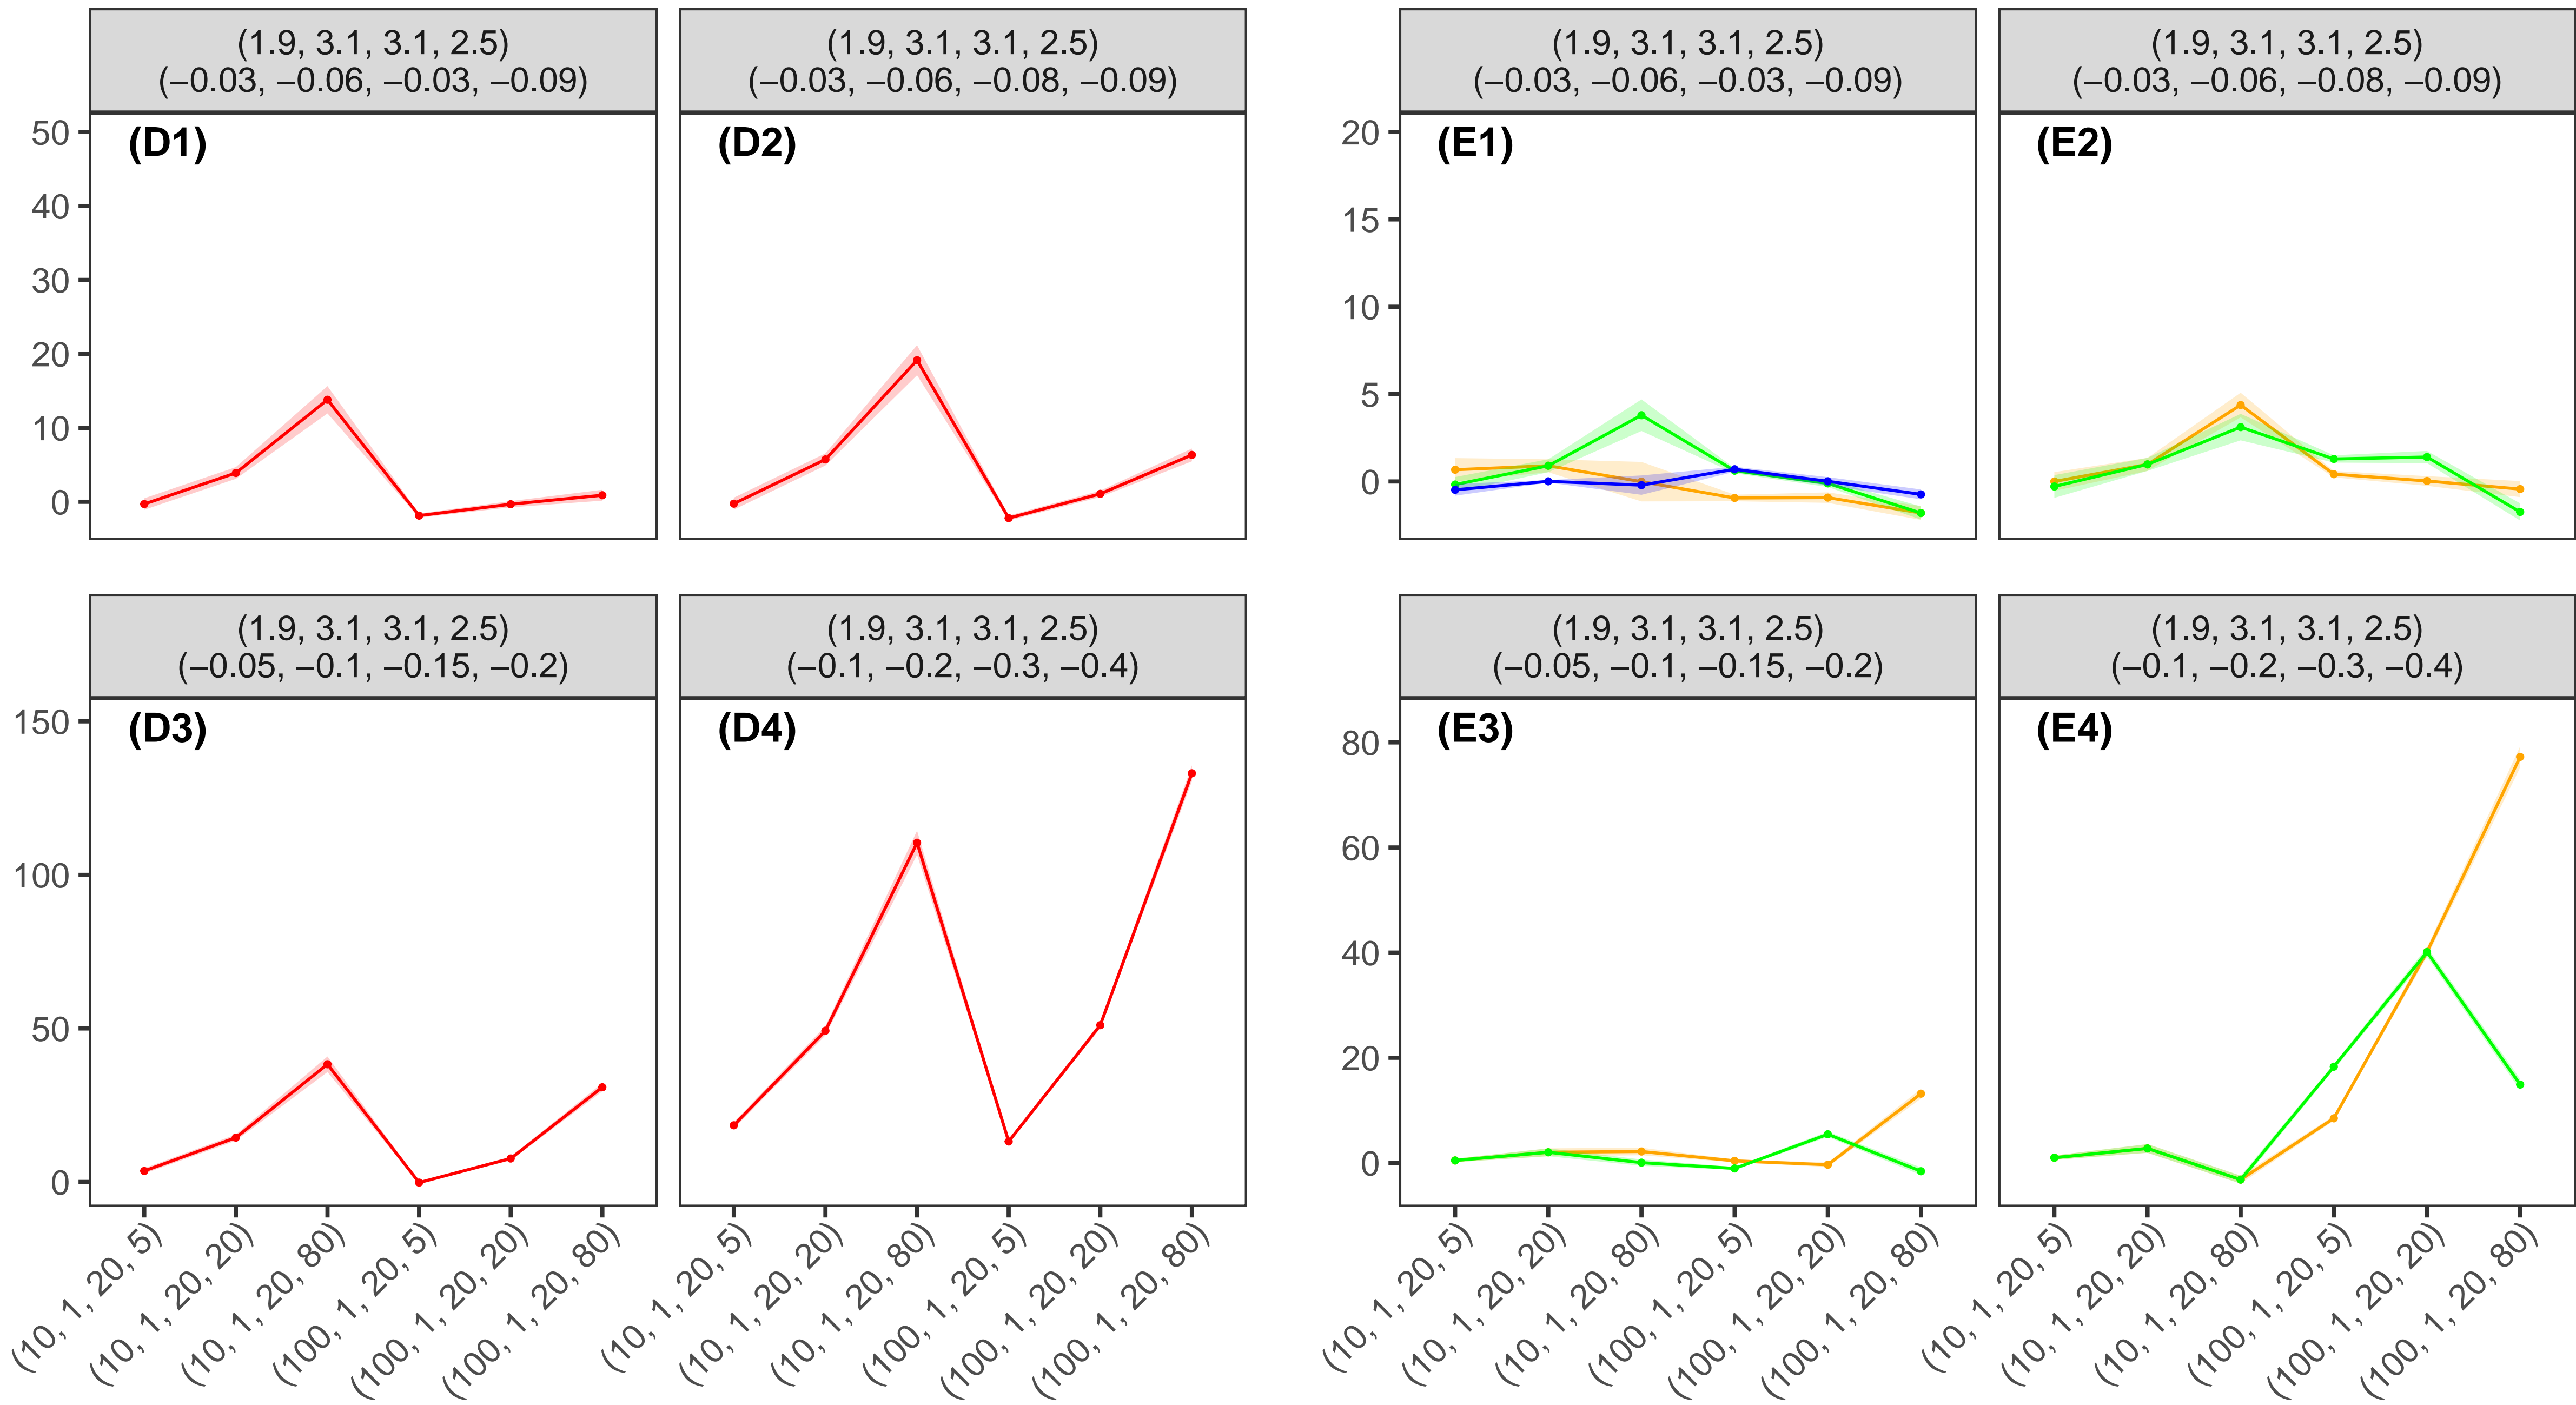

(Fixed ordering cost, Unit holding cost, Unit shortage cost, Unit wastage cost)
