# Supplementary material for: Platelet Inventory Management with Approximate Dynamic Programming
Source: Atypon-hosted journal article supplement (doi:10.1287/ijoc.2023.0245), 2025-03-11
Supplement: ijoc.2023.0245.cd.zip [file Figure 11.pdf › 2023.0245-master/results/Figure 11.pdf]

● Demand ● Endog. ● Exoge. ● Deter.

Average Target Inventory Levels

Unit expiration cost = 2

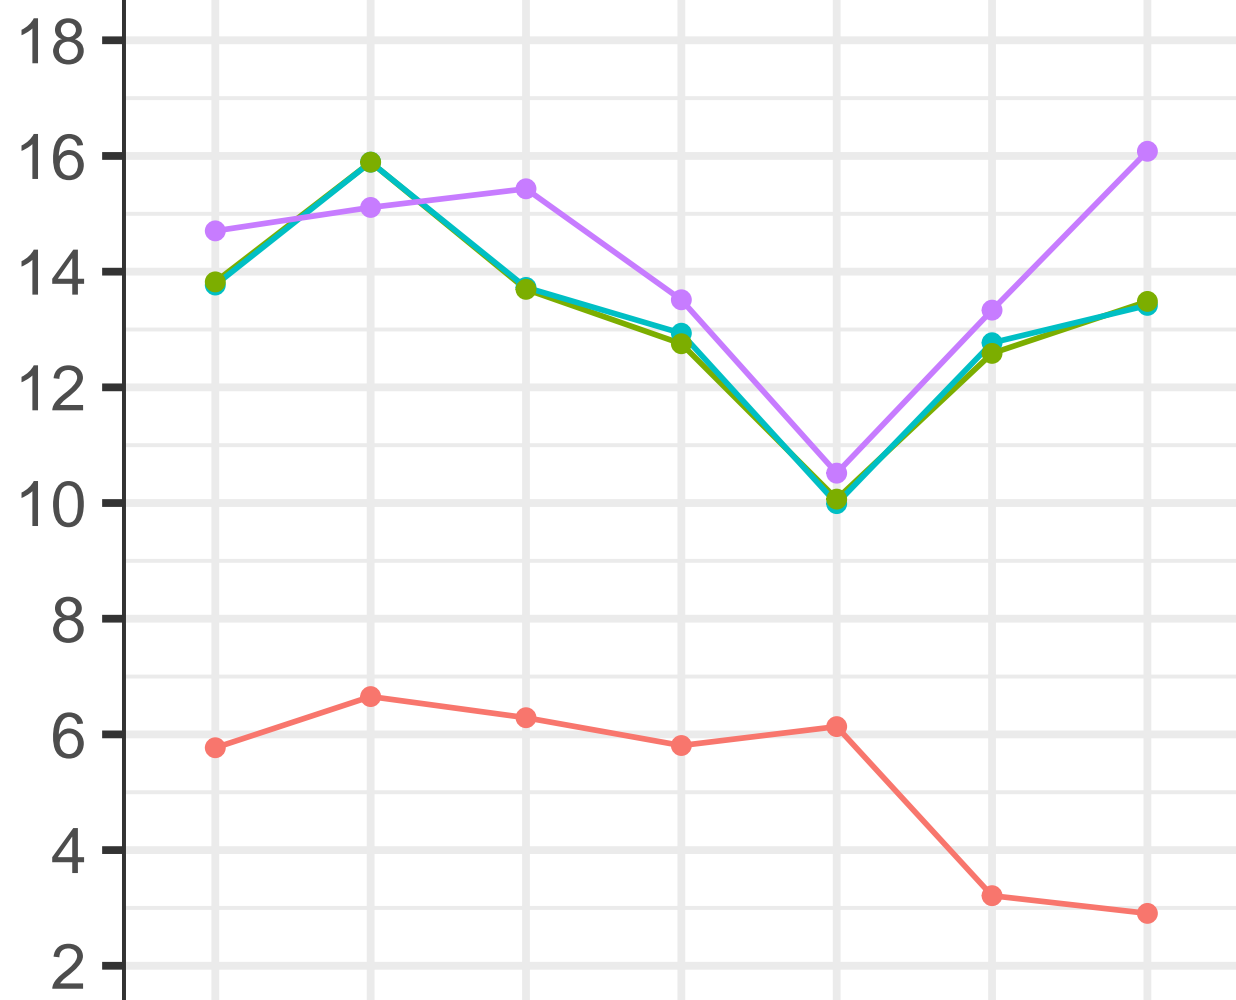

Unit expiration cost = 5

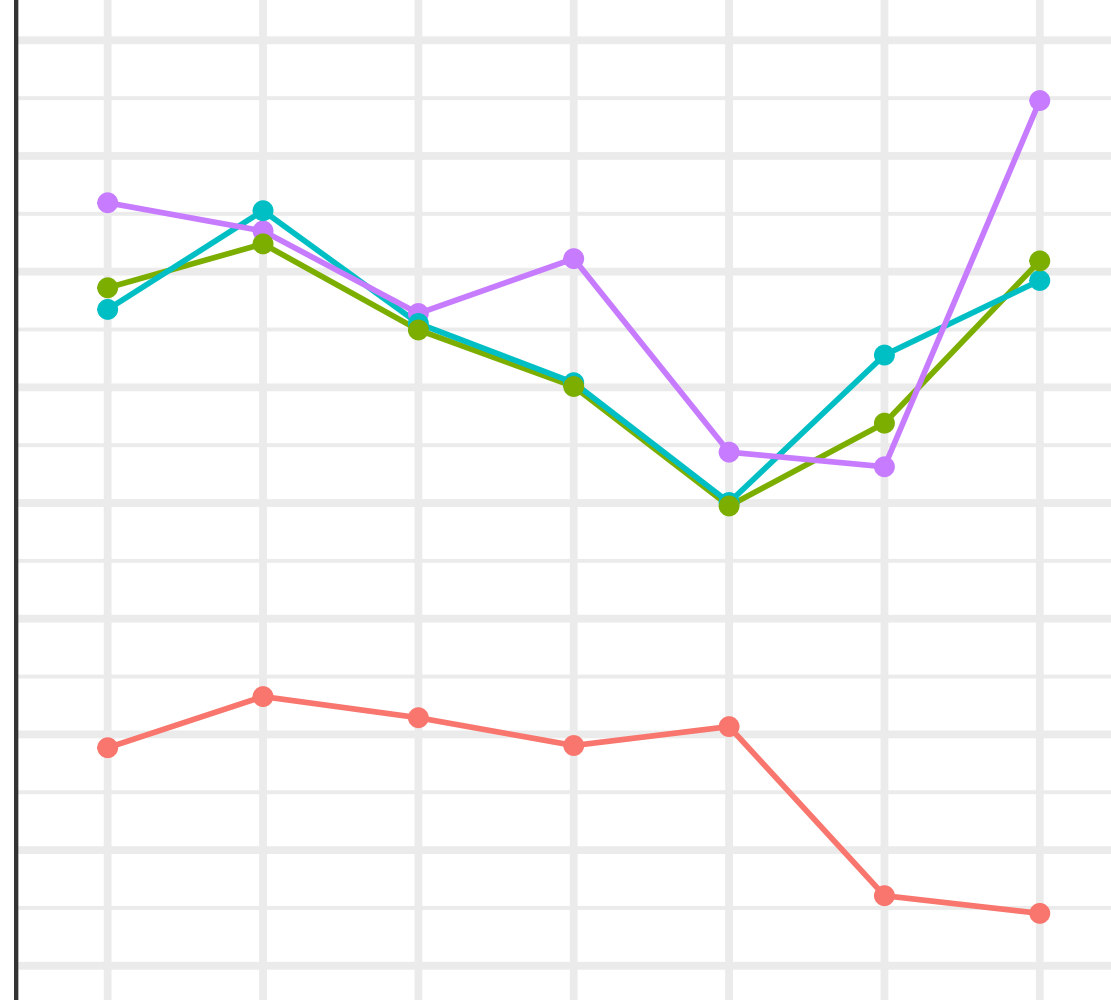

Unit expiration cost = 20

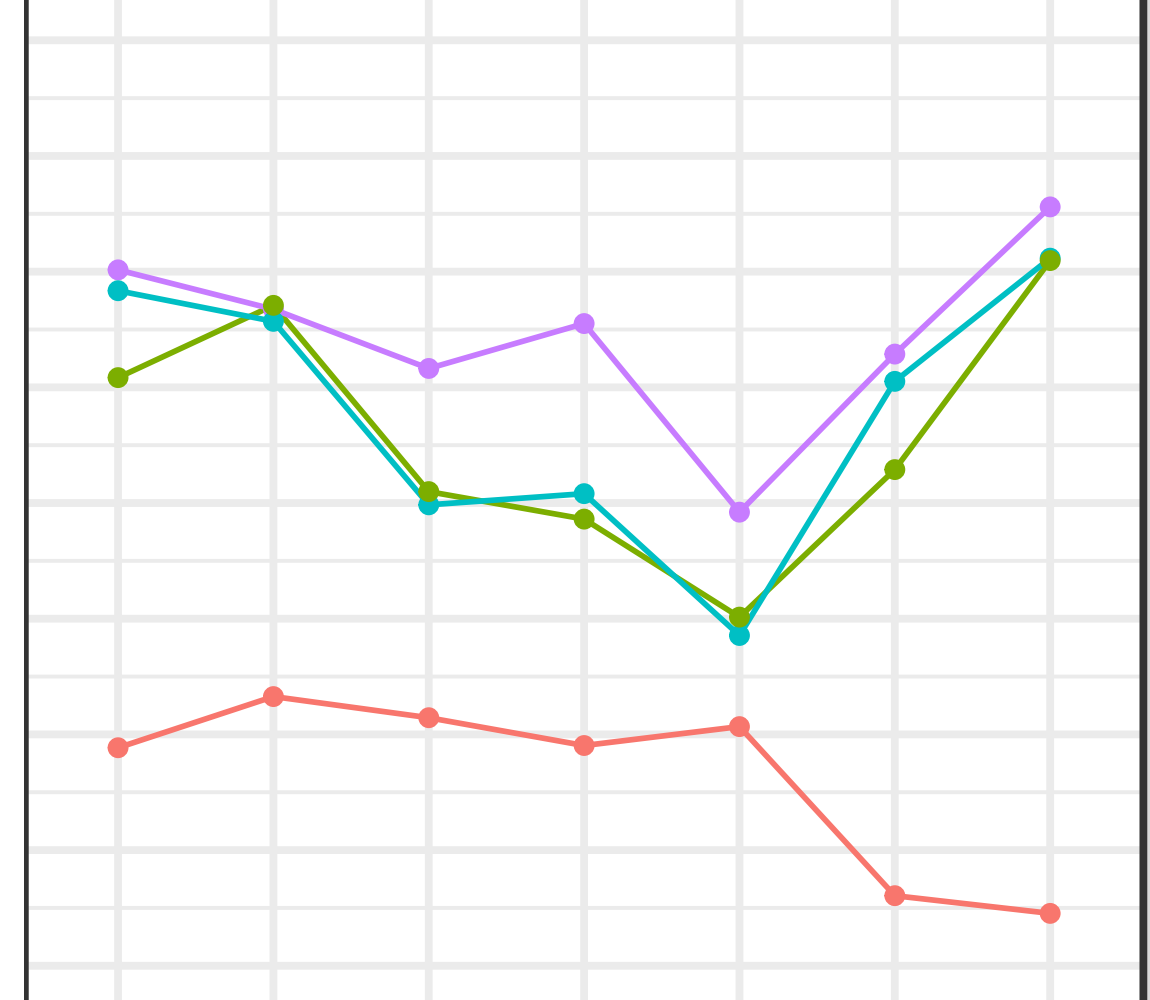

Fixed ordering cost = 20

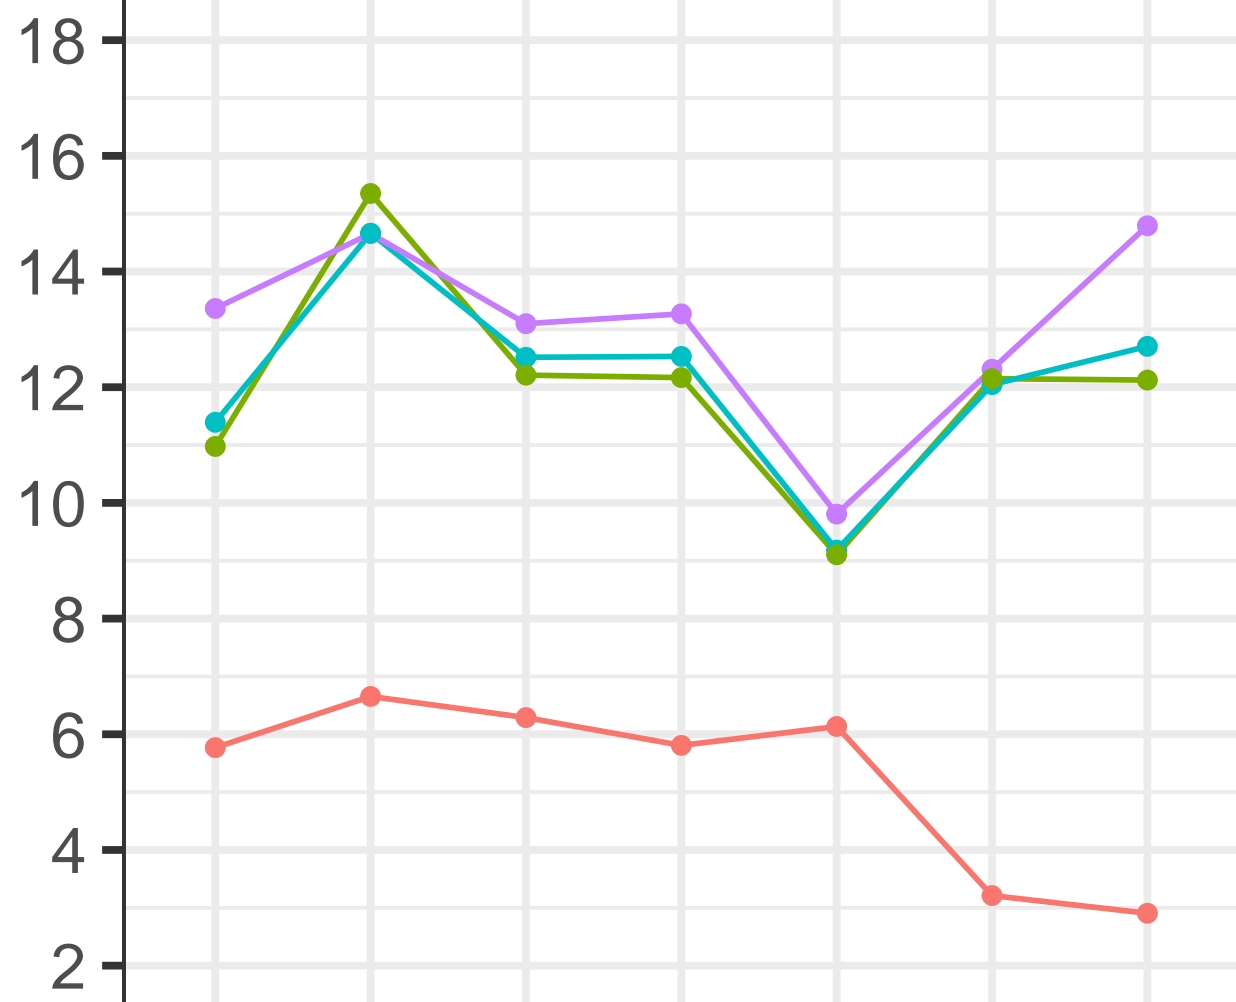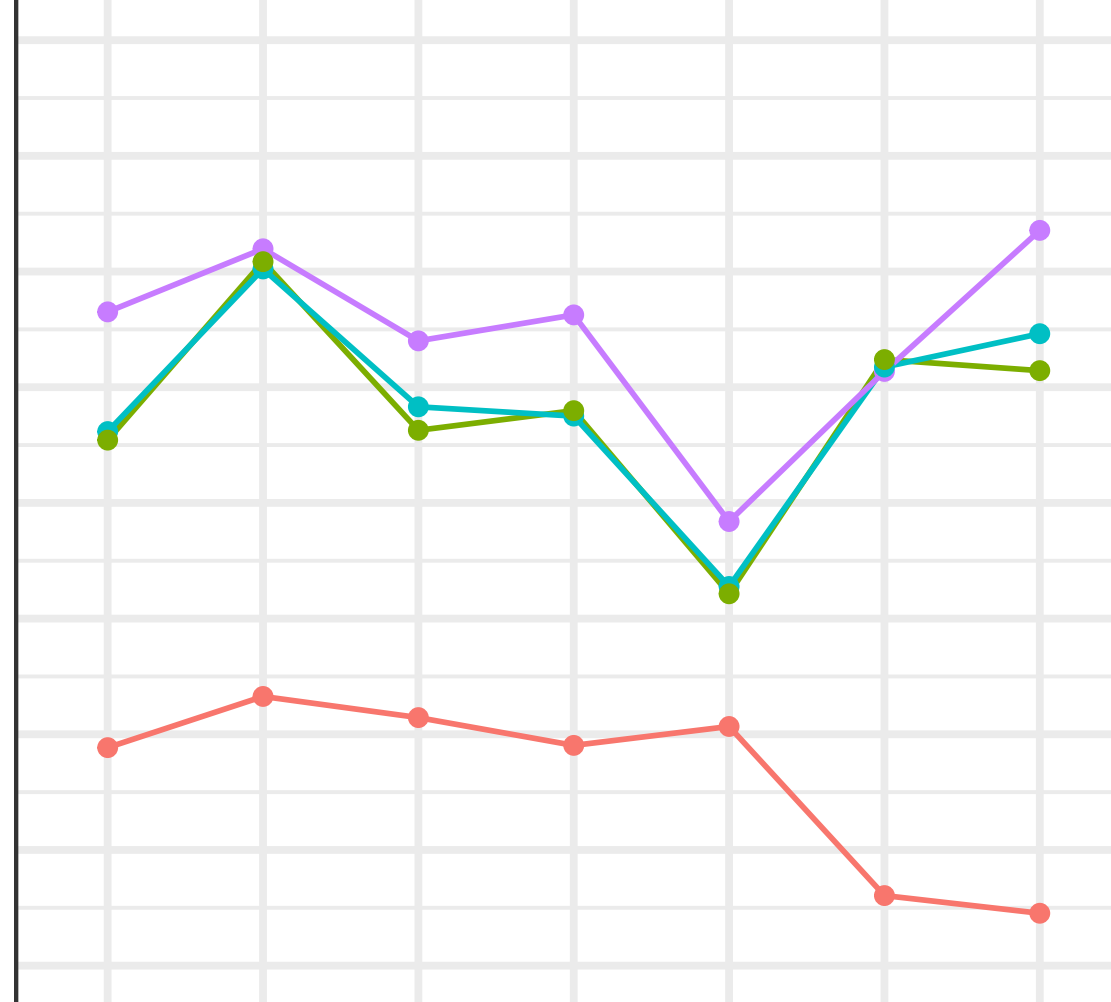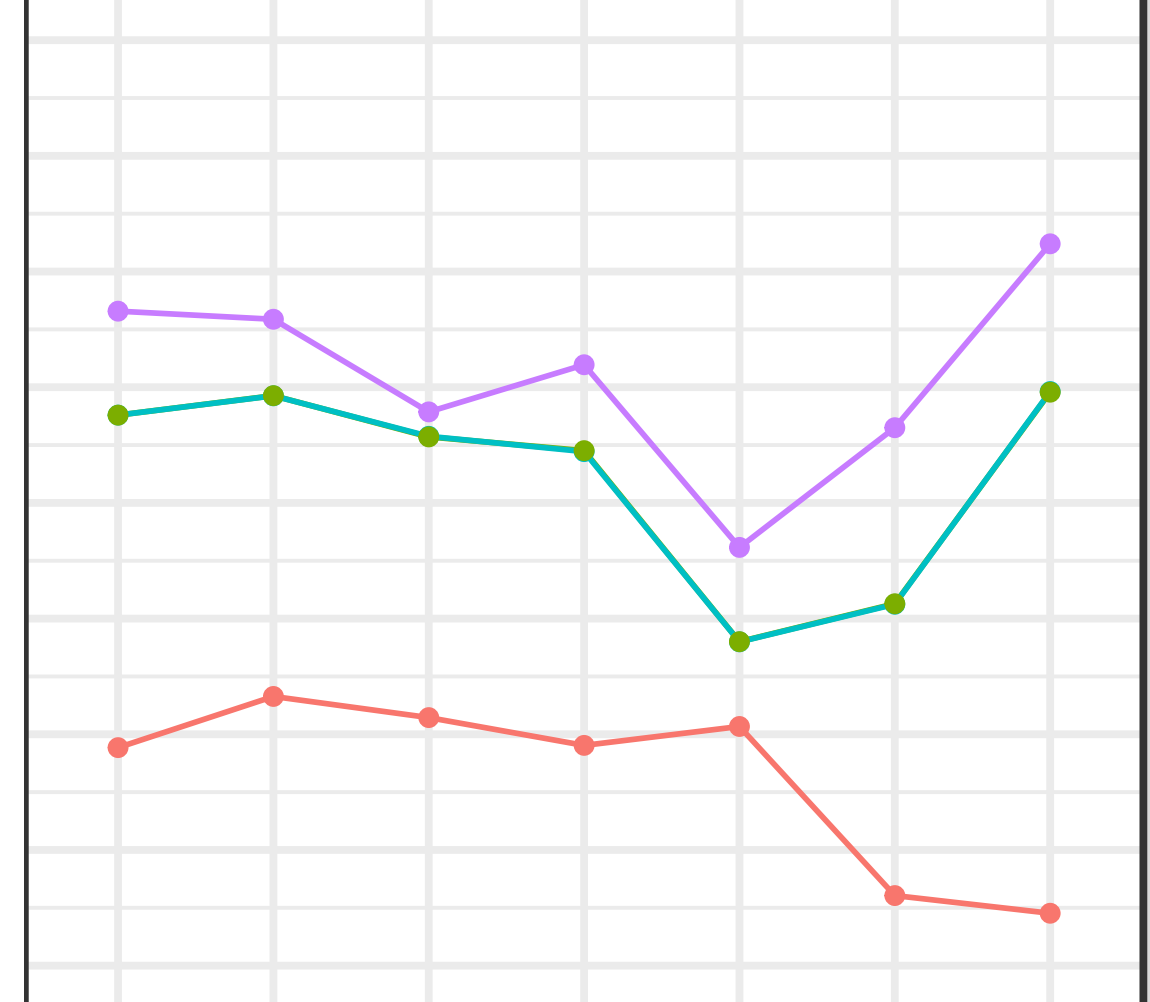

Fixed ordering cost = 10
