# Supplementary figures and images for: Platelet Inventory Management with Approximate Dynamic Programming
Source: Atypon-hosted journal article supplement (doi:10.1287/ijoc.2023.0245), 2025-03-11

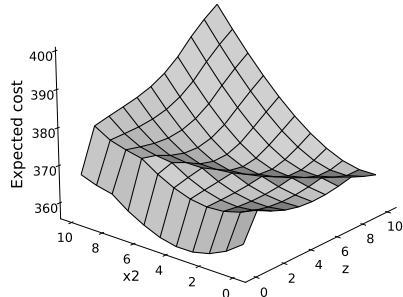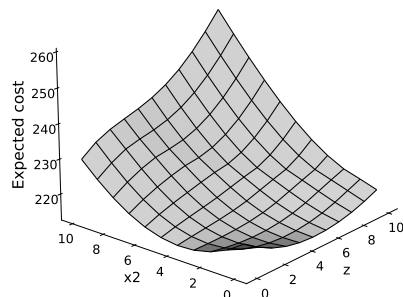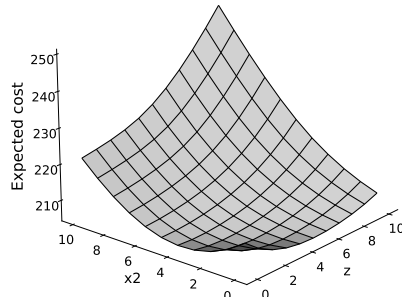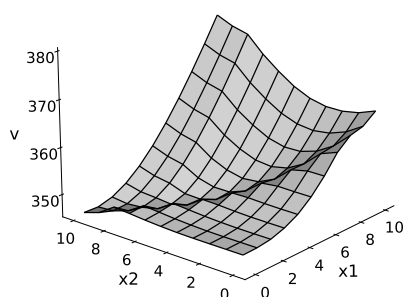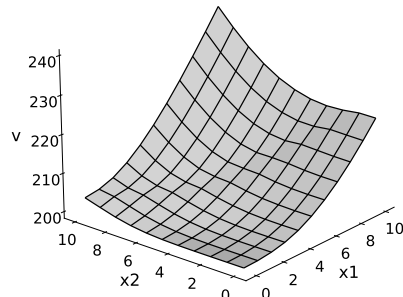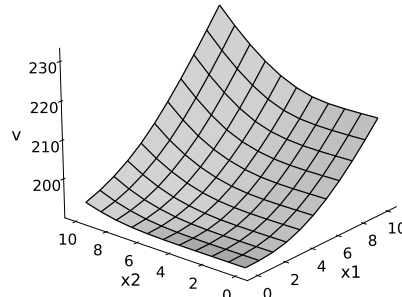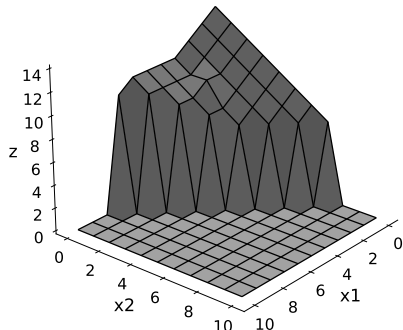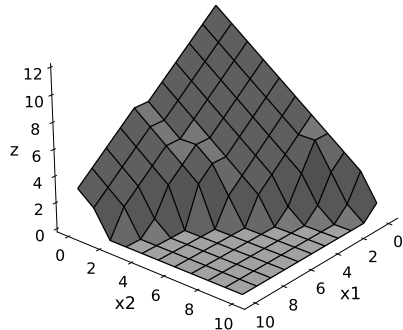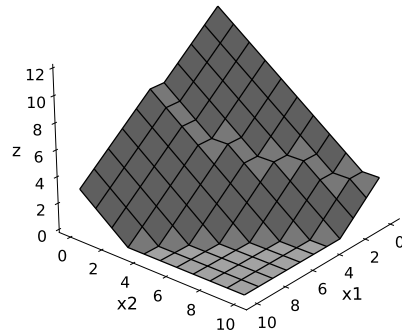

Supplement: ijoc.2023.0245.cd.zip [file Figure 1.pdf › 2023.0245-master/results/Figure 1.pdf]

Daily demand

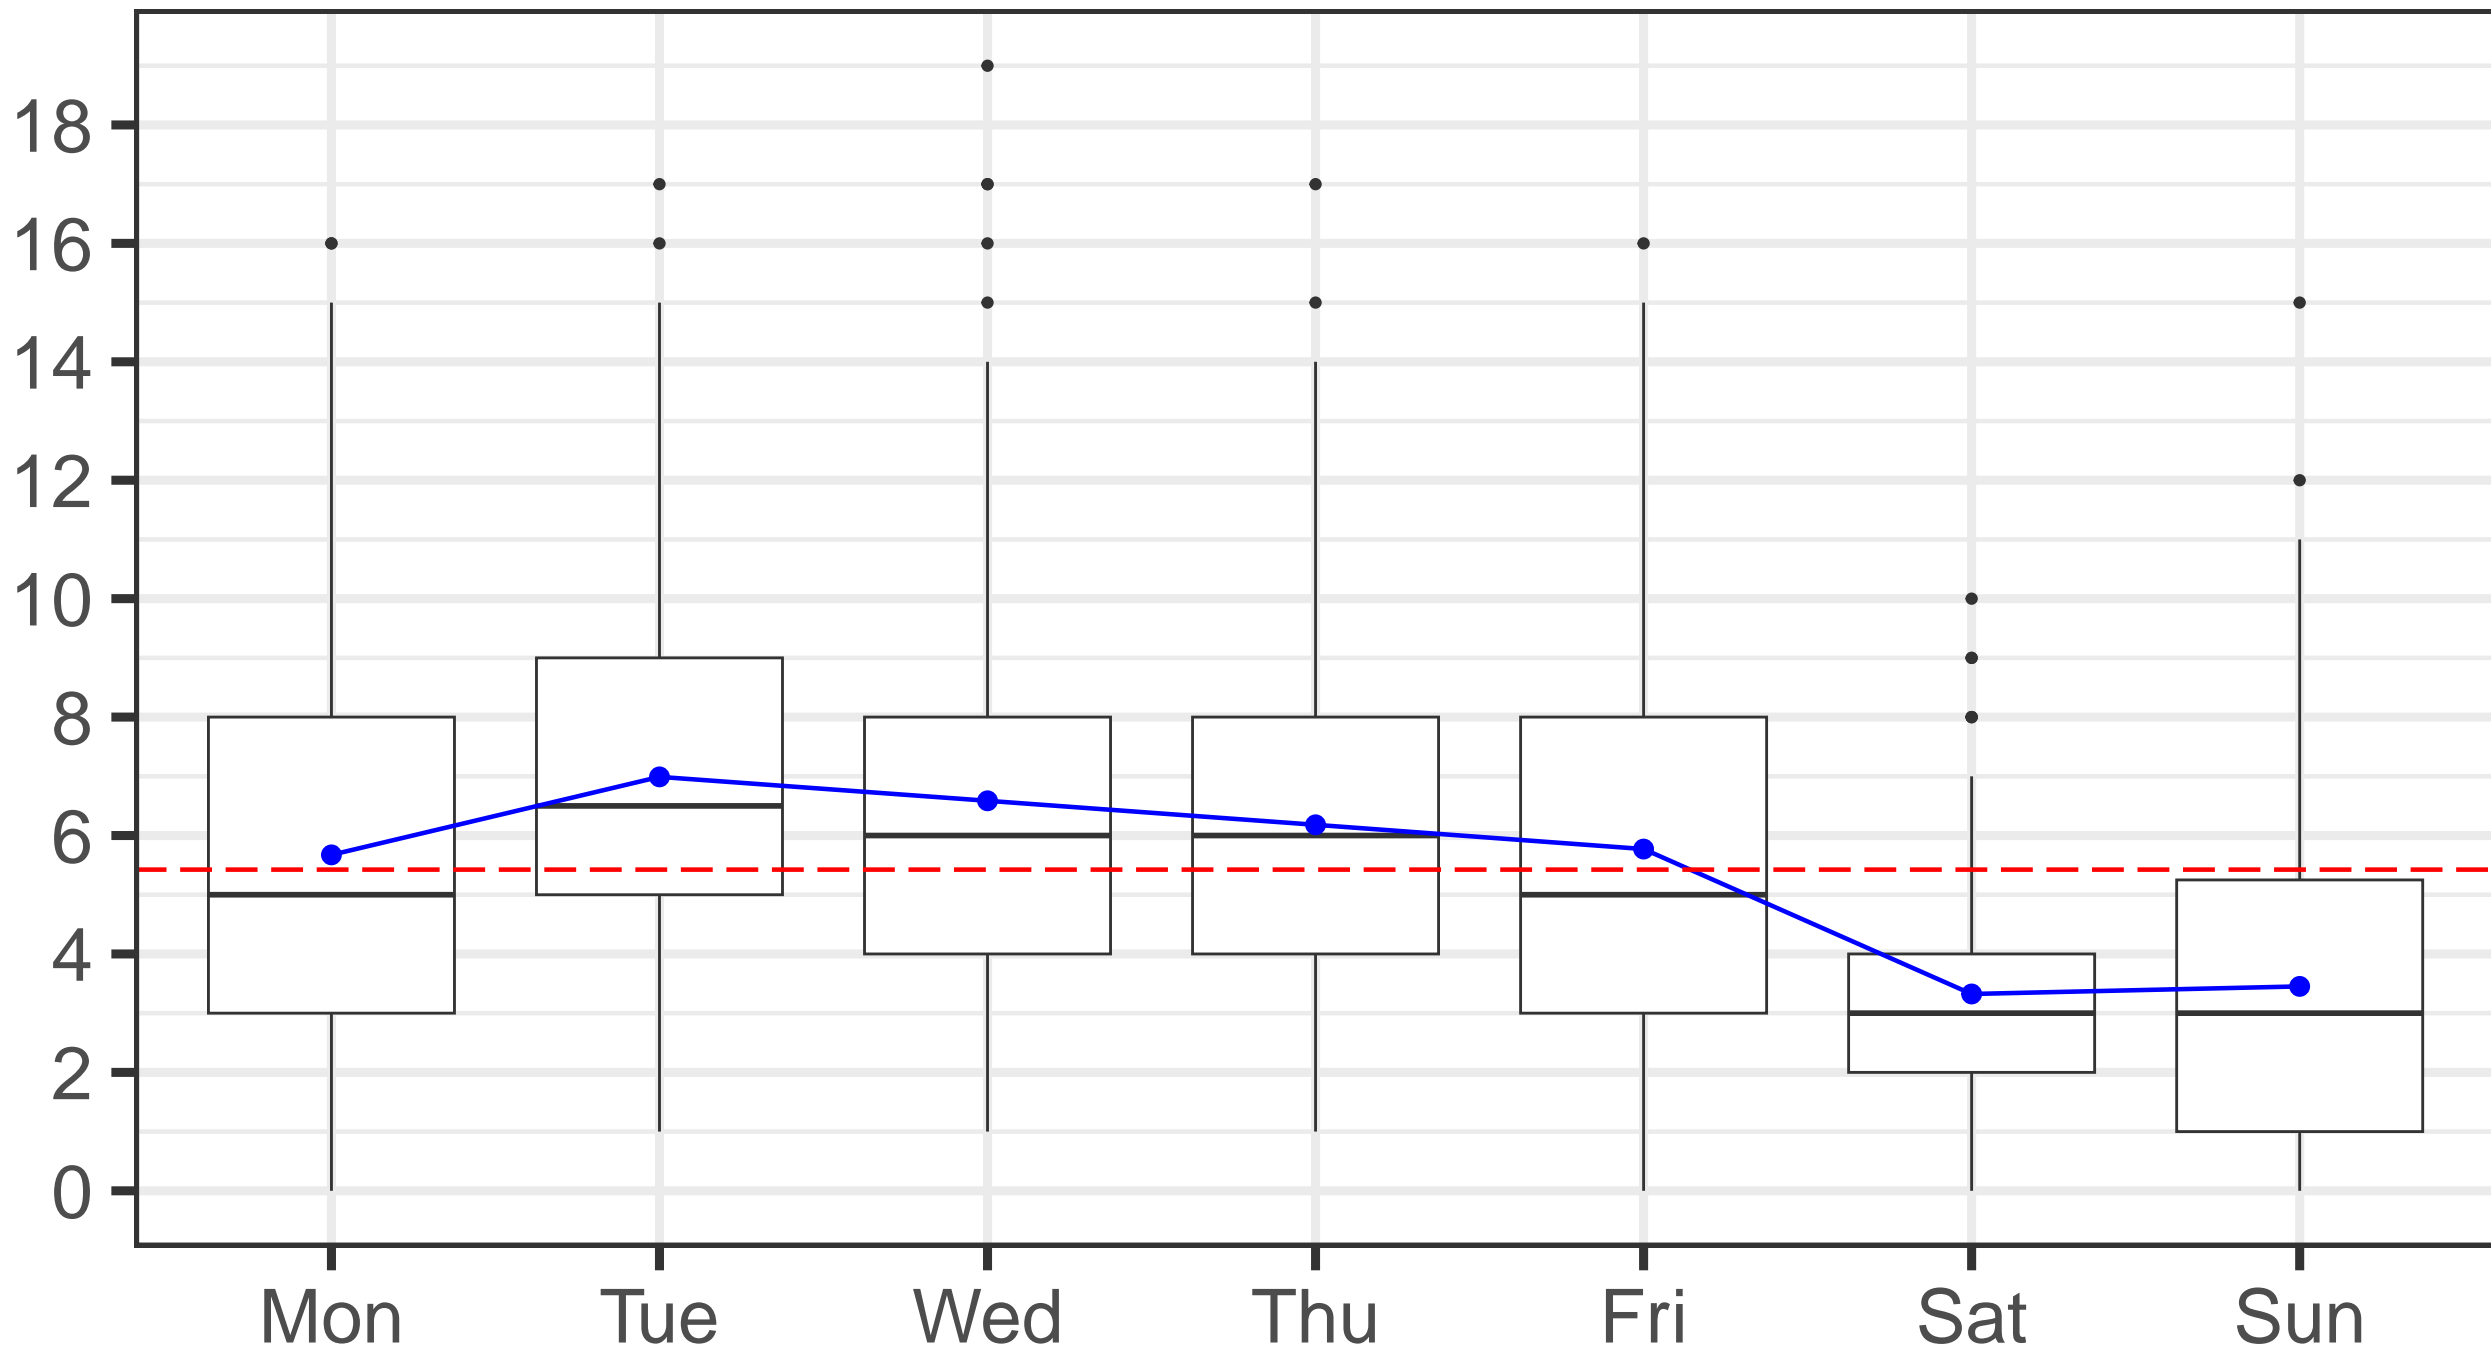

Supplement: ijoc.2023.0245.cd.zip [file Figure 10.pdf › 2023.0245-master/results/Figure 10.pdf]

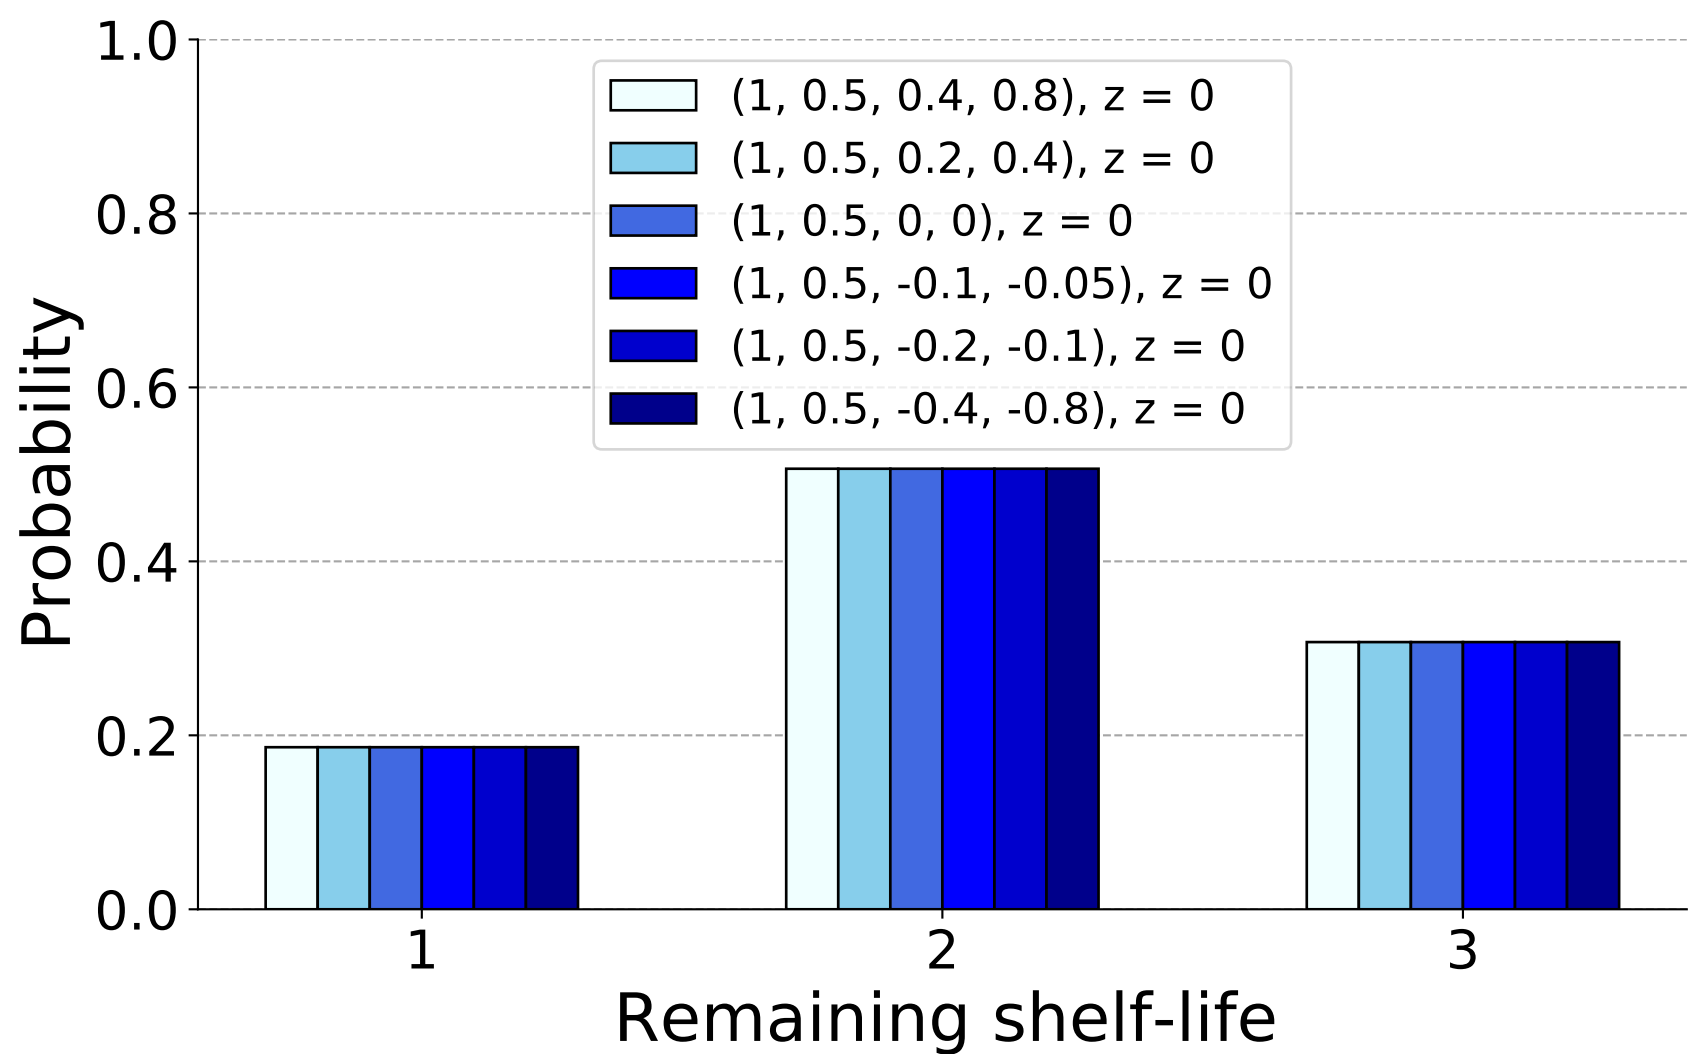

Supplement: ijoc.2023.0245.cd.zip [file Figure 2 (A).pdf › 2023.0245-master/results/Figure 2 (A).pdf]

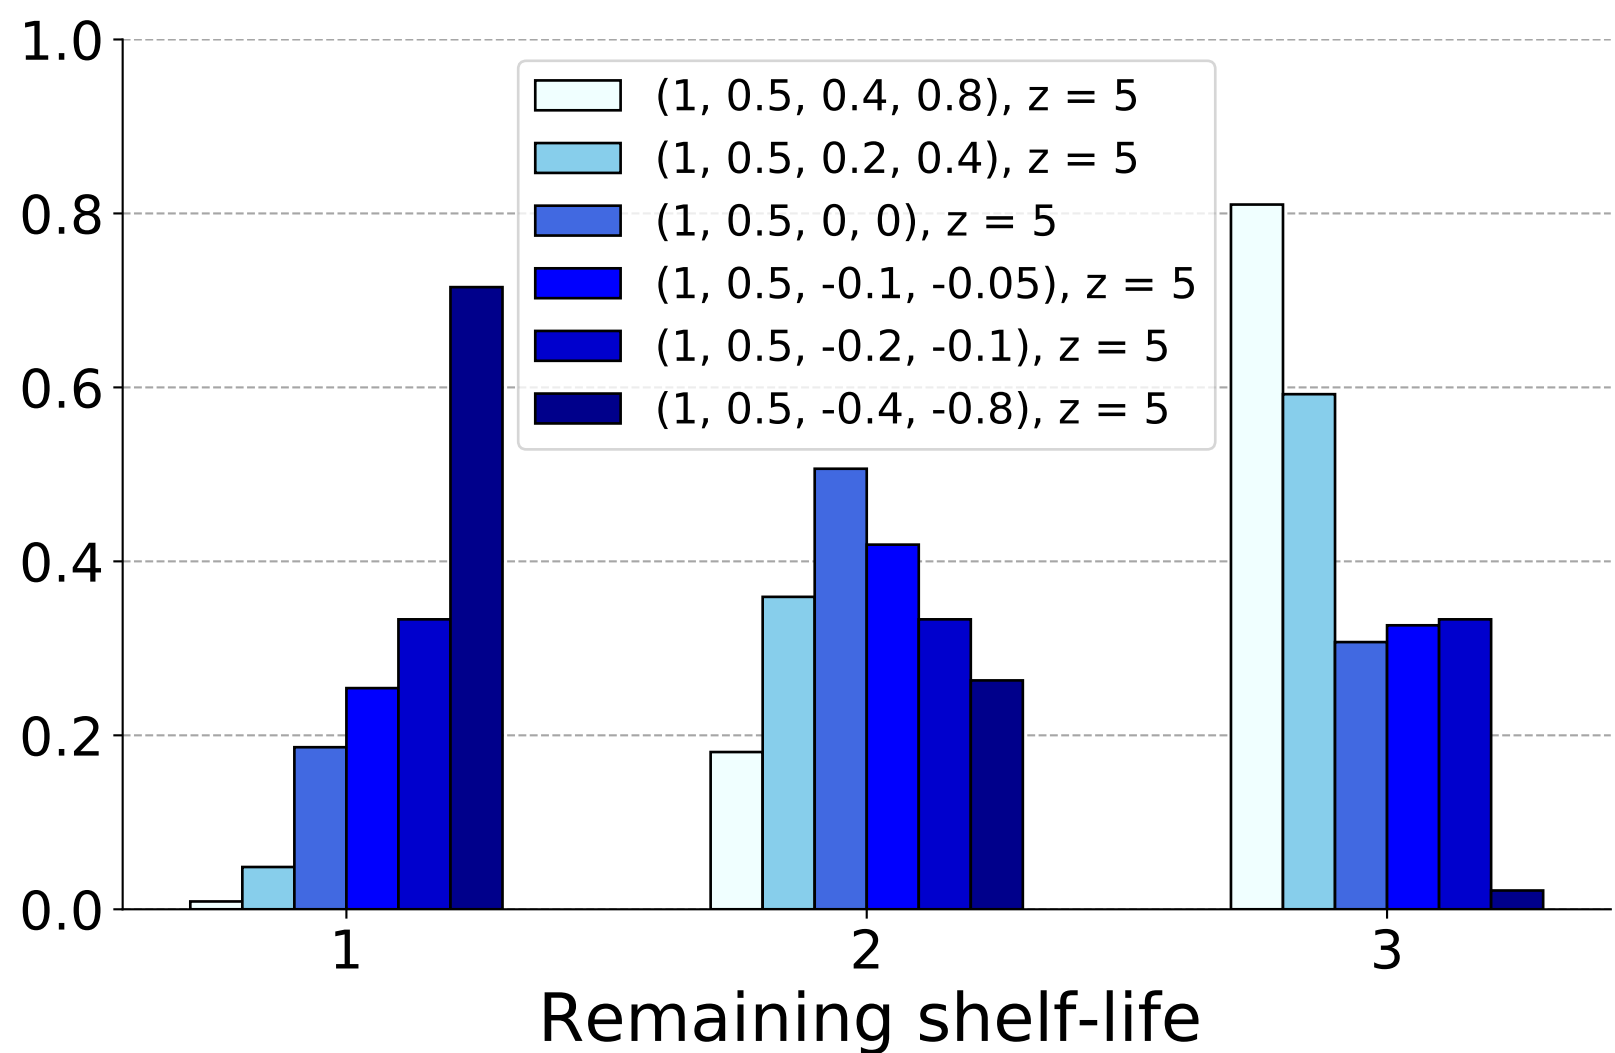

Supplement: ijoc.2023.0245.cd.zip [file Figure 2 (B).pdf › 2023.0245-master/results/Figure 2 (B).pdf]

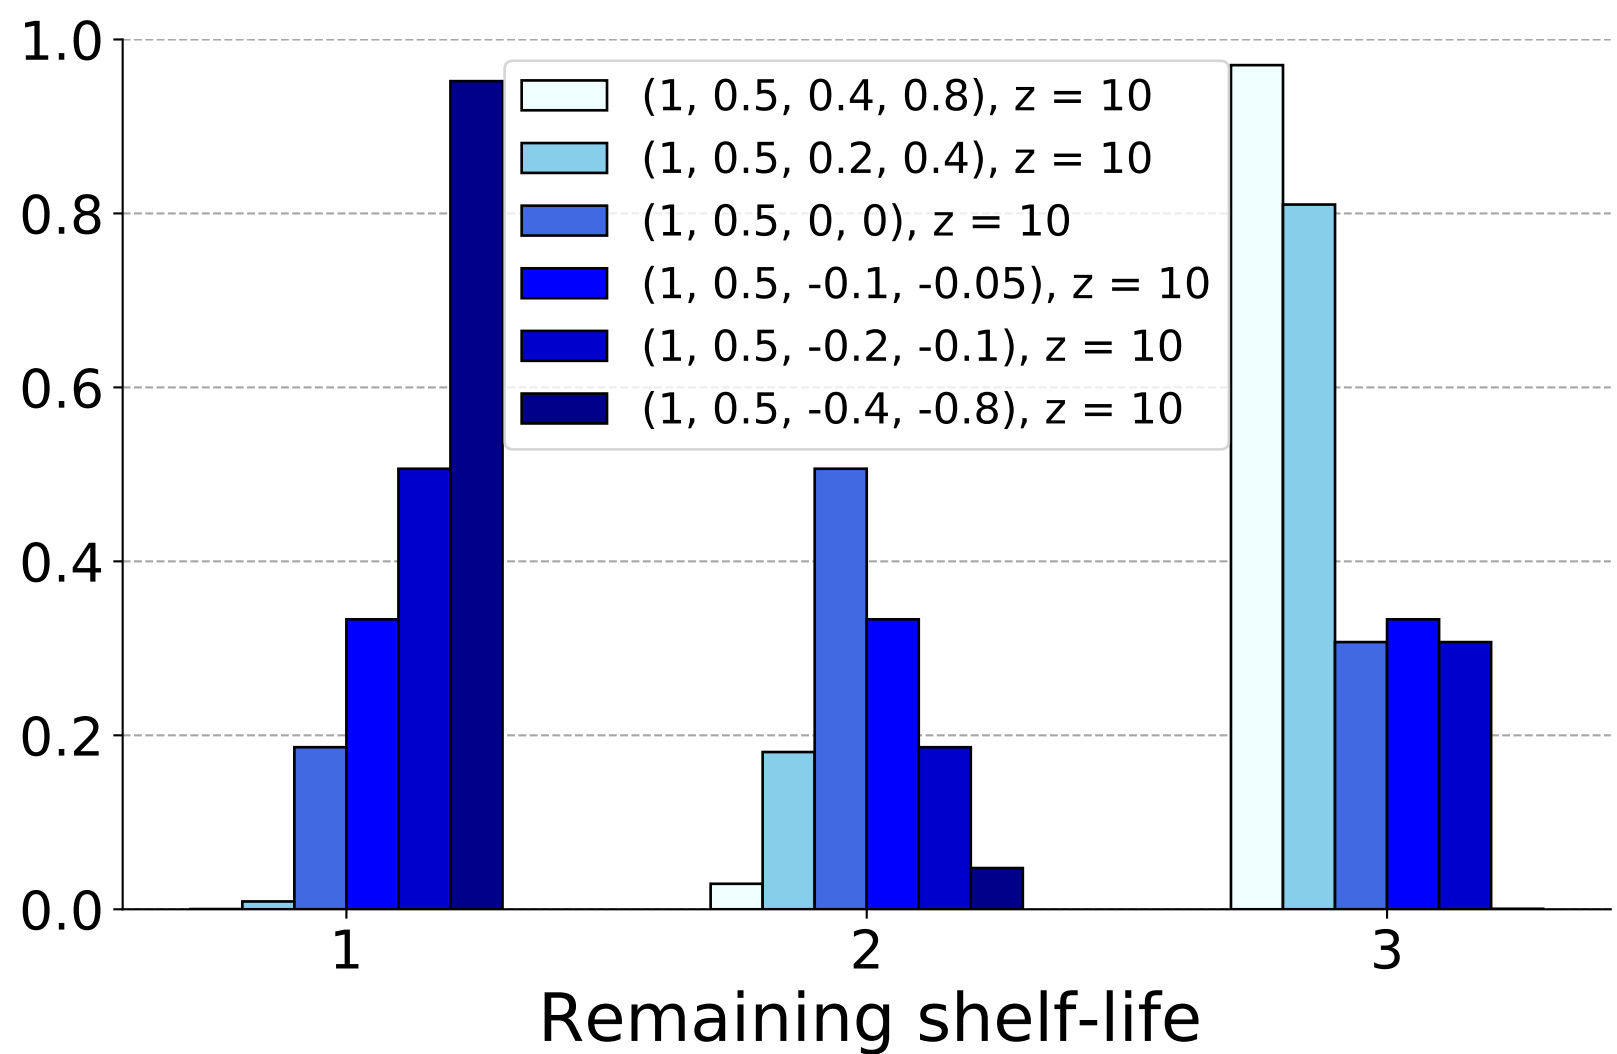

Supplement: ijoc.2023.0245.cd.zip [file Figure 2 (C).pdf › 2023.0245-master/results/Figure 2 (C).pdf]

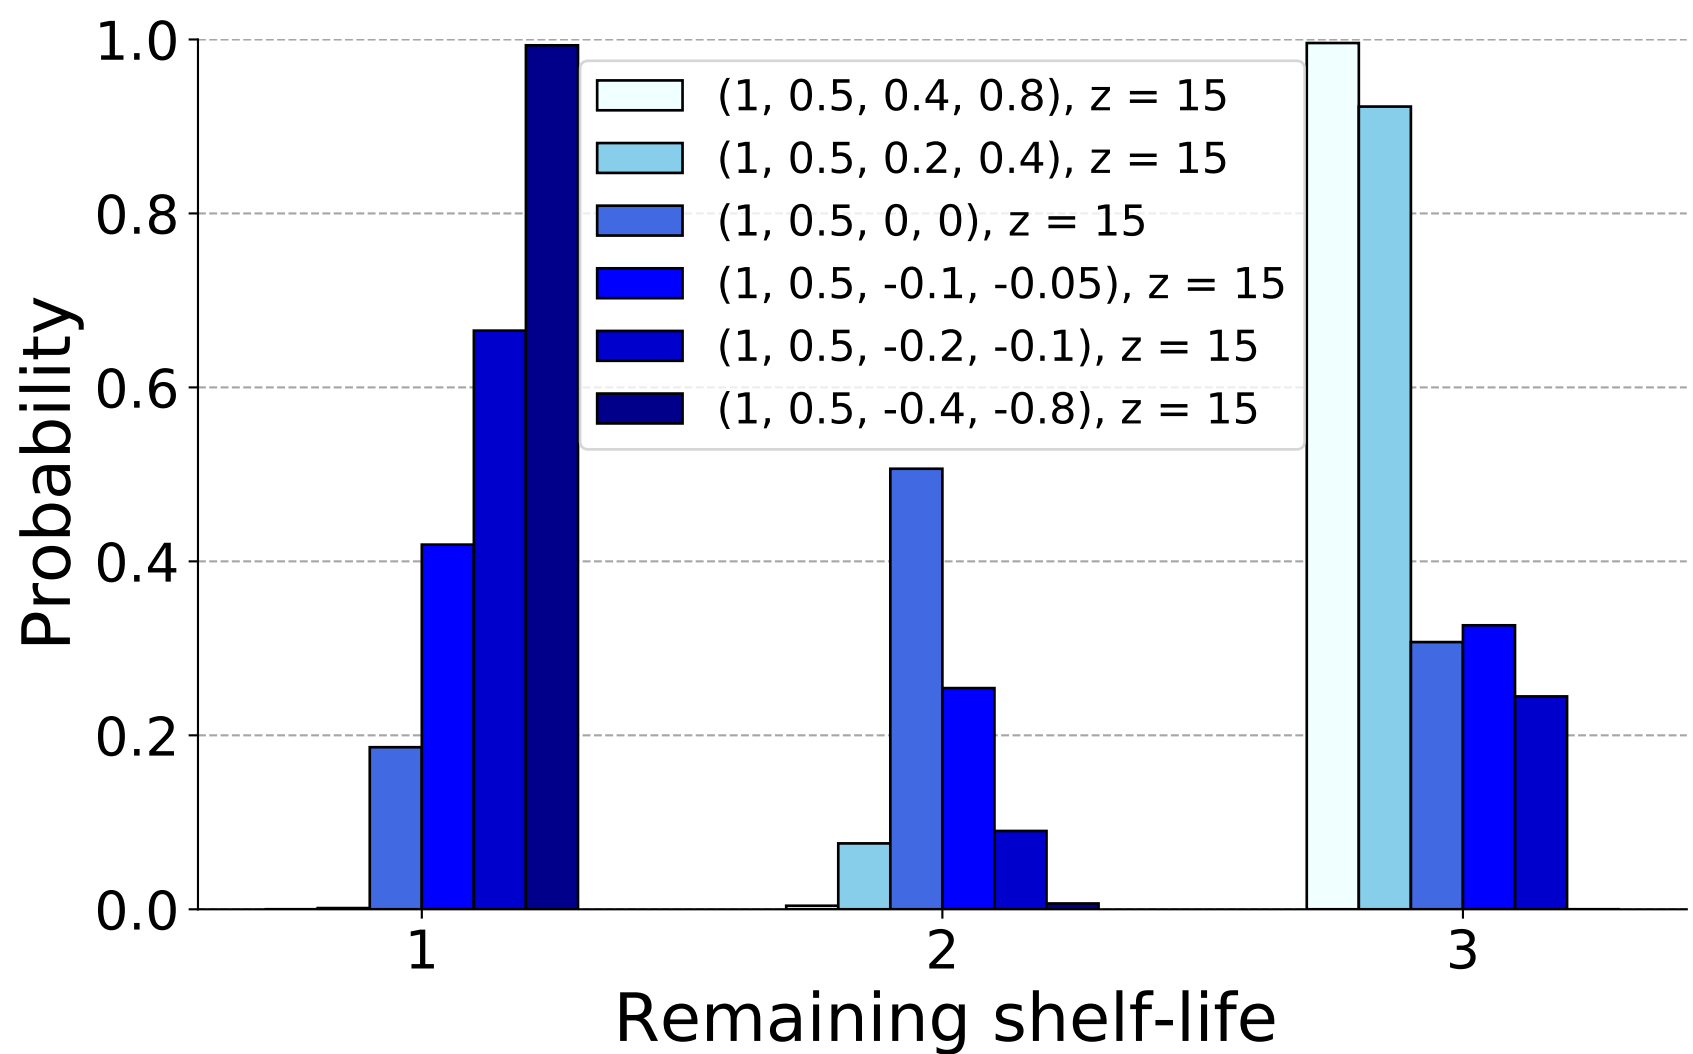

Supplement: ijoc.2023.0245.cd.zip [file Figure 2 (D).pdf › 2023.0245-master/results/Figure 2 (D).pdf]

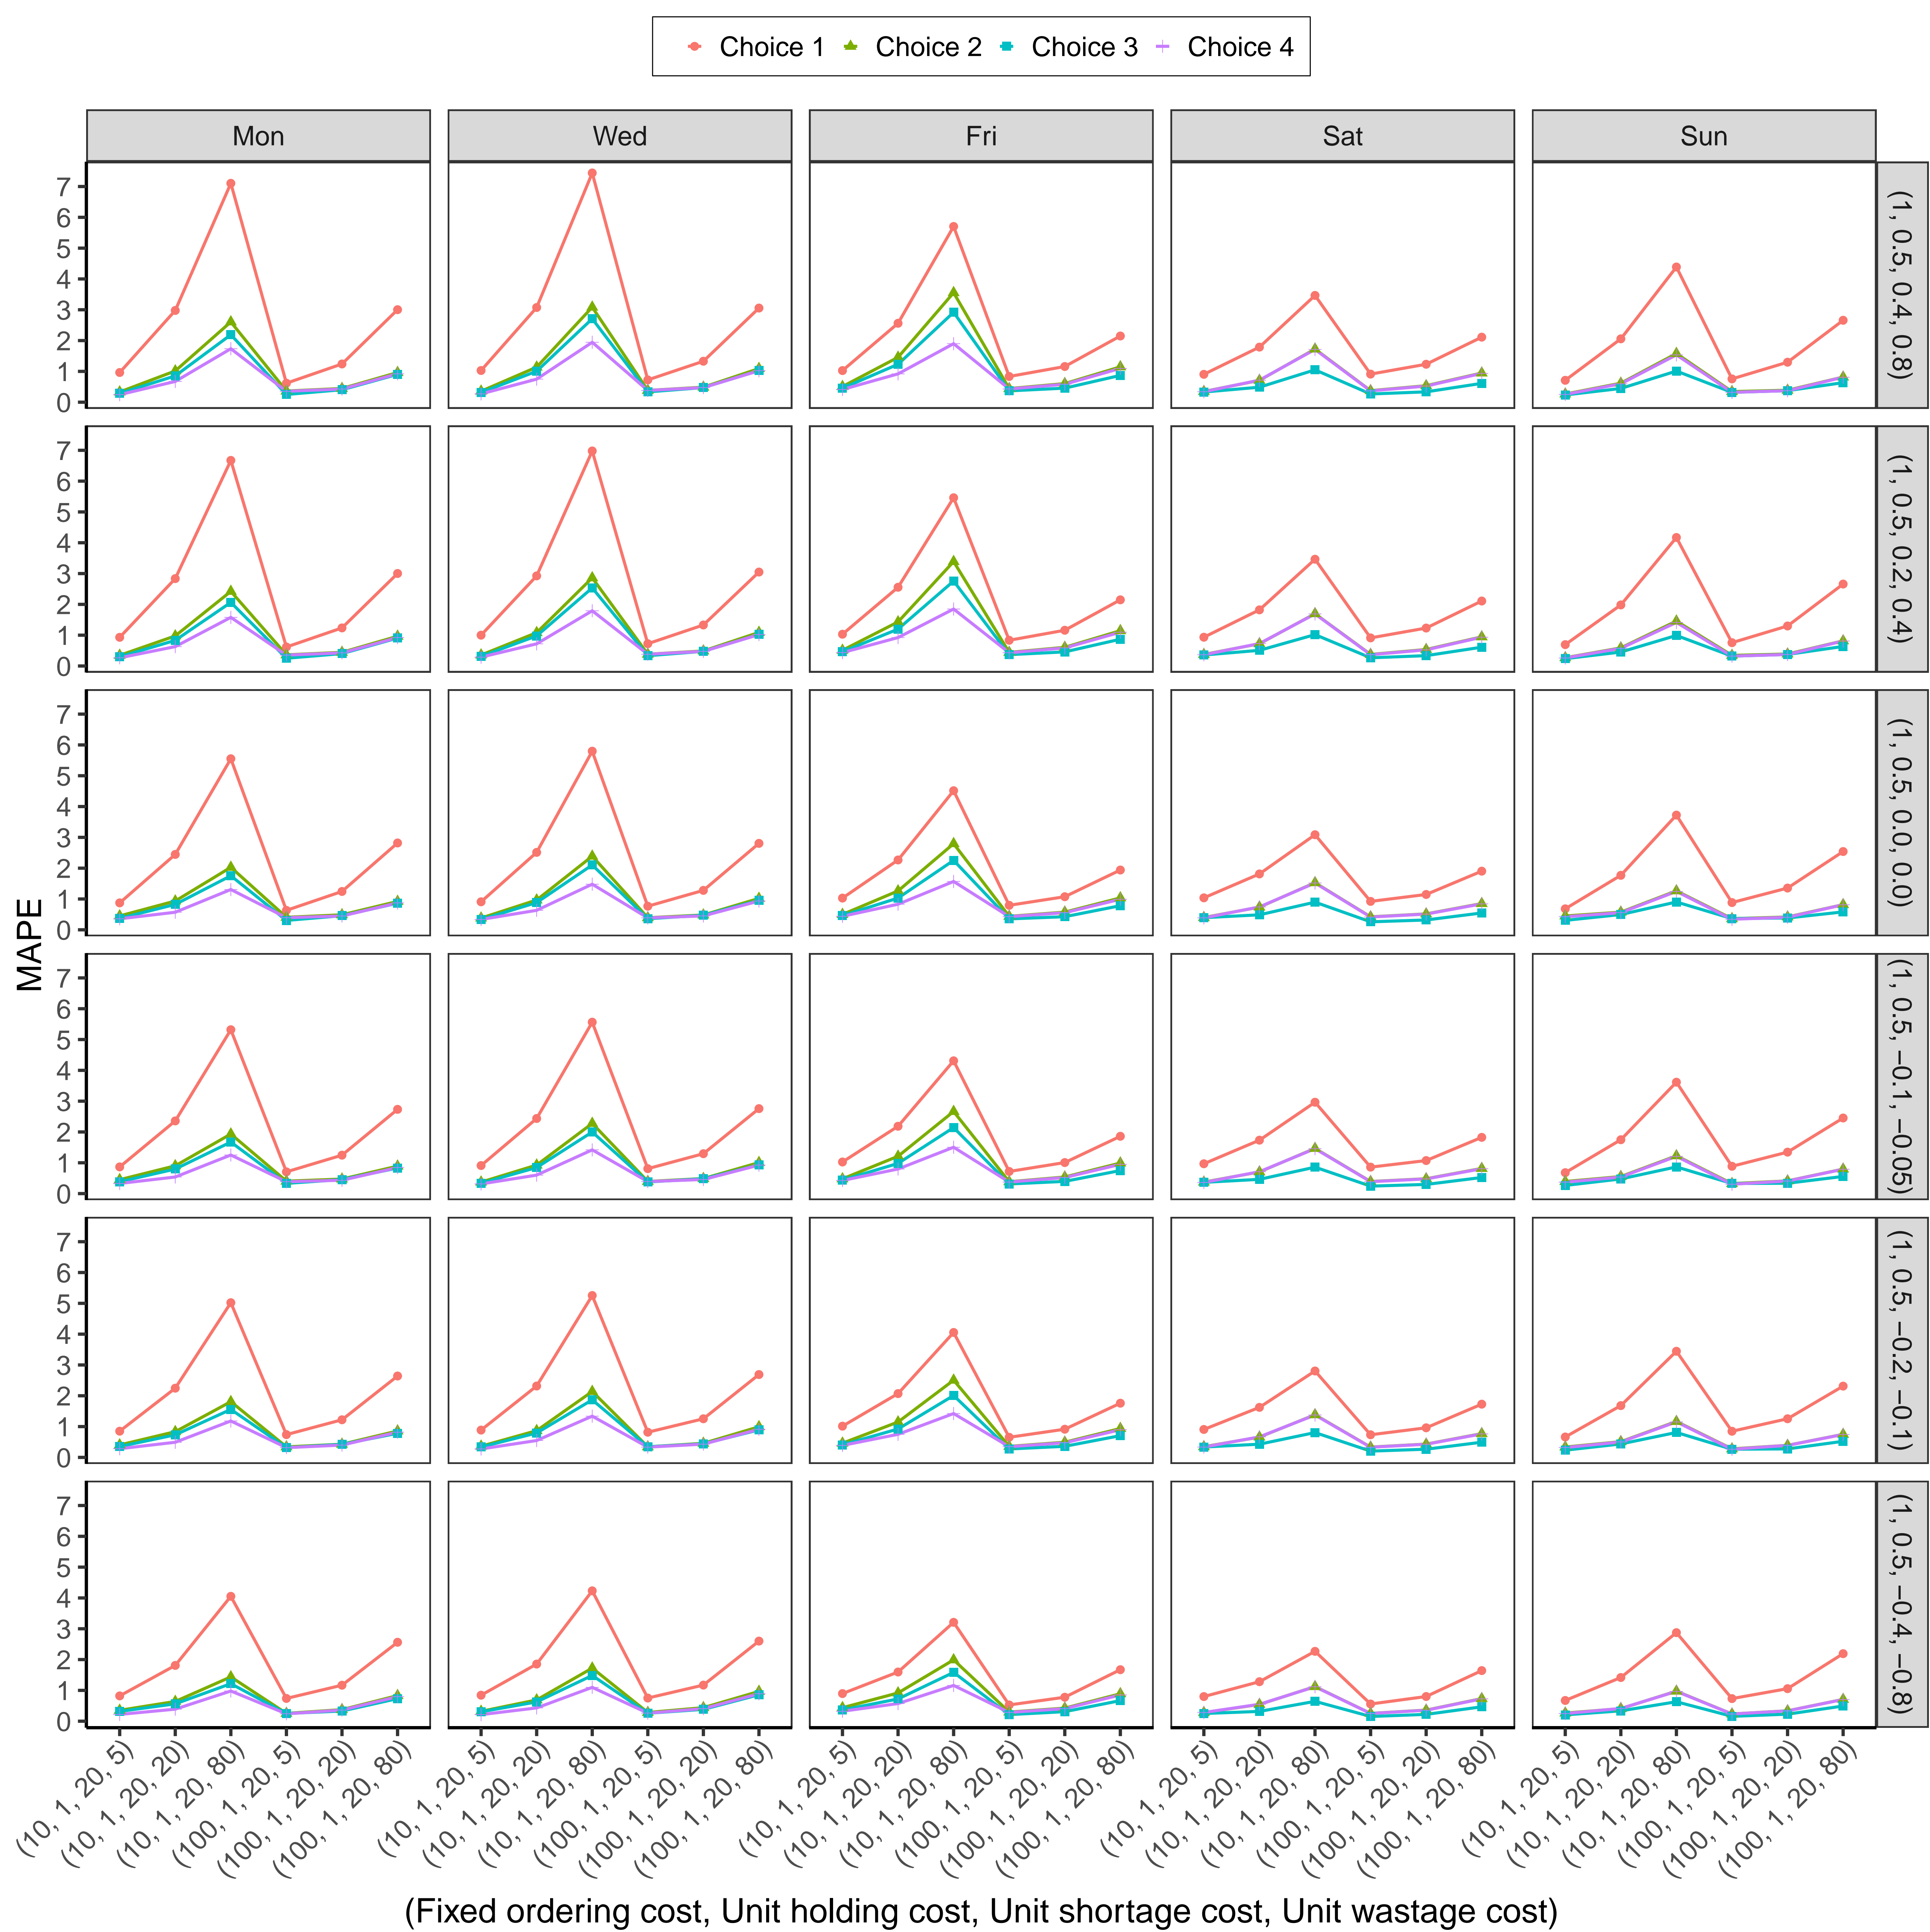

Supplement: ijoc.2023.0245.cd.zip [file Figure 3.pdf › 2023.0245-master/results/Figure 3.pdf]

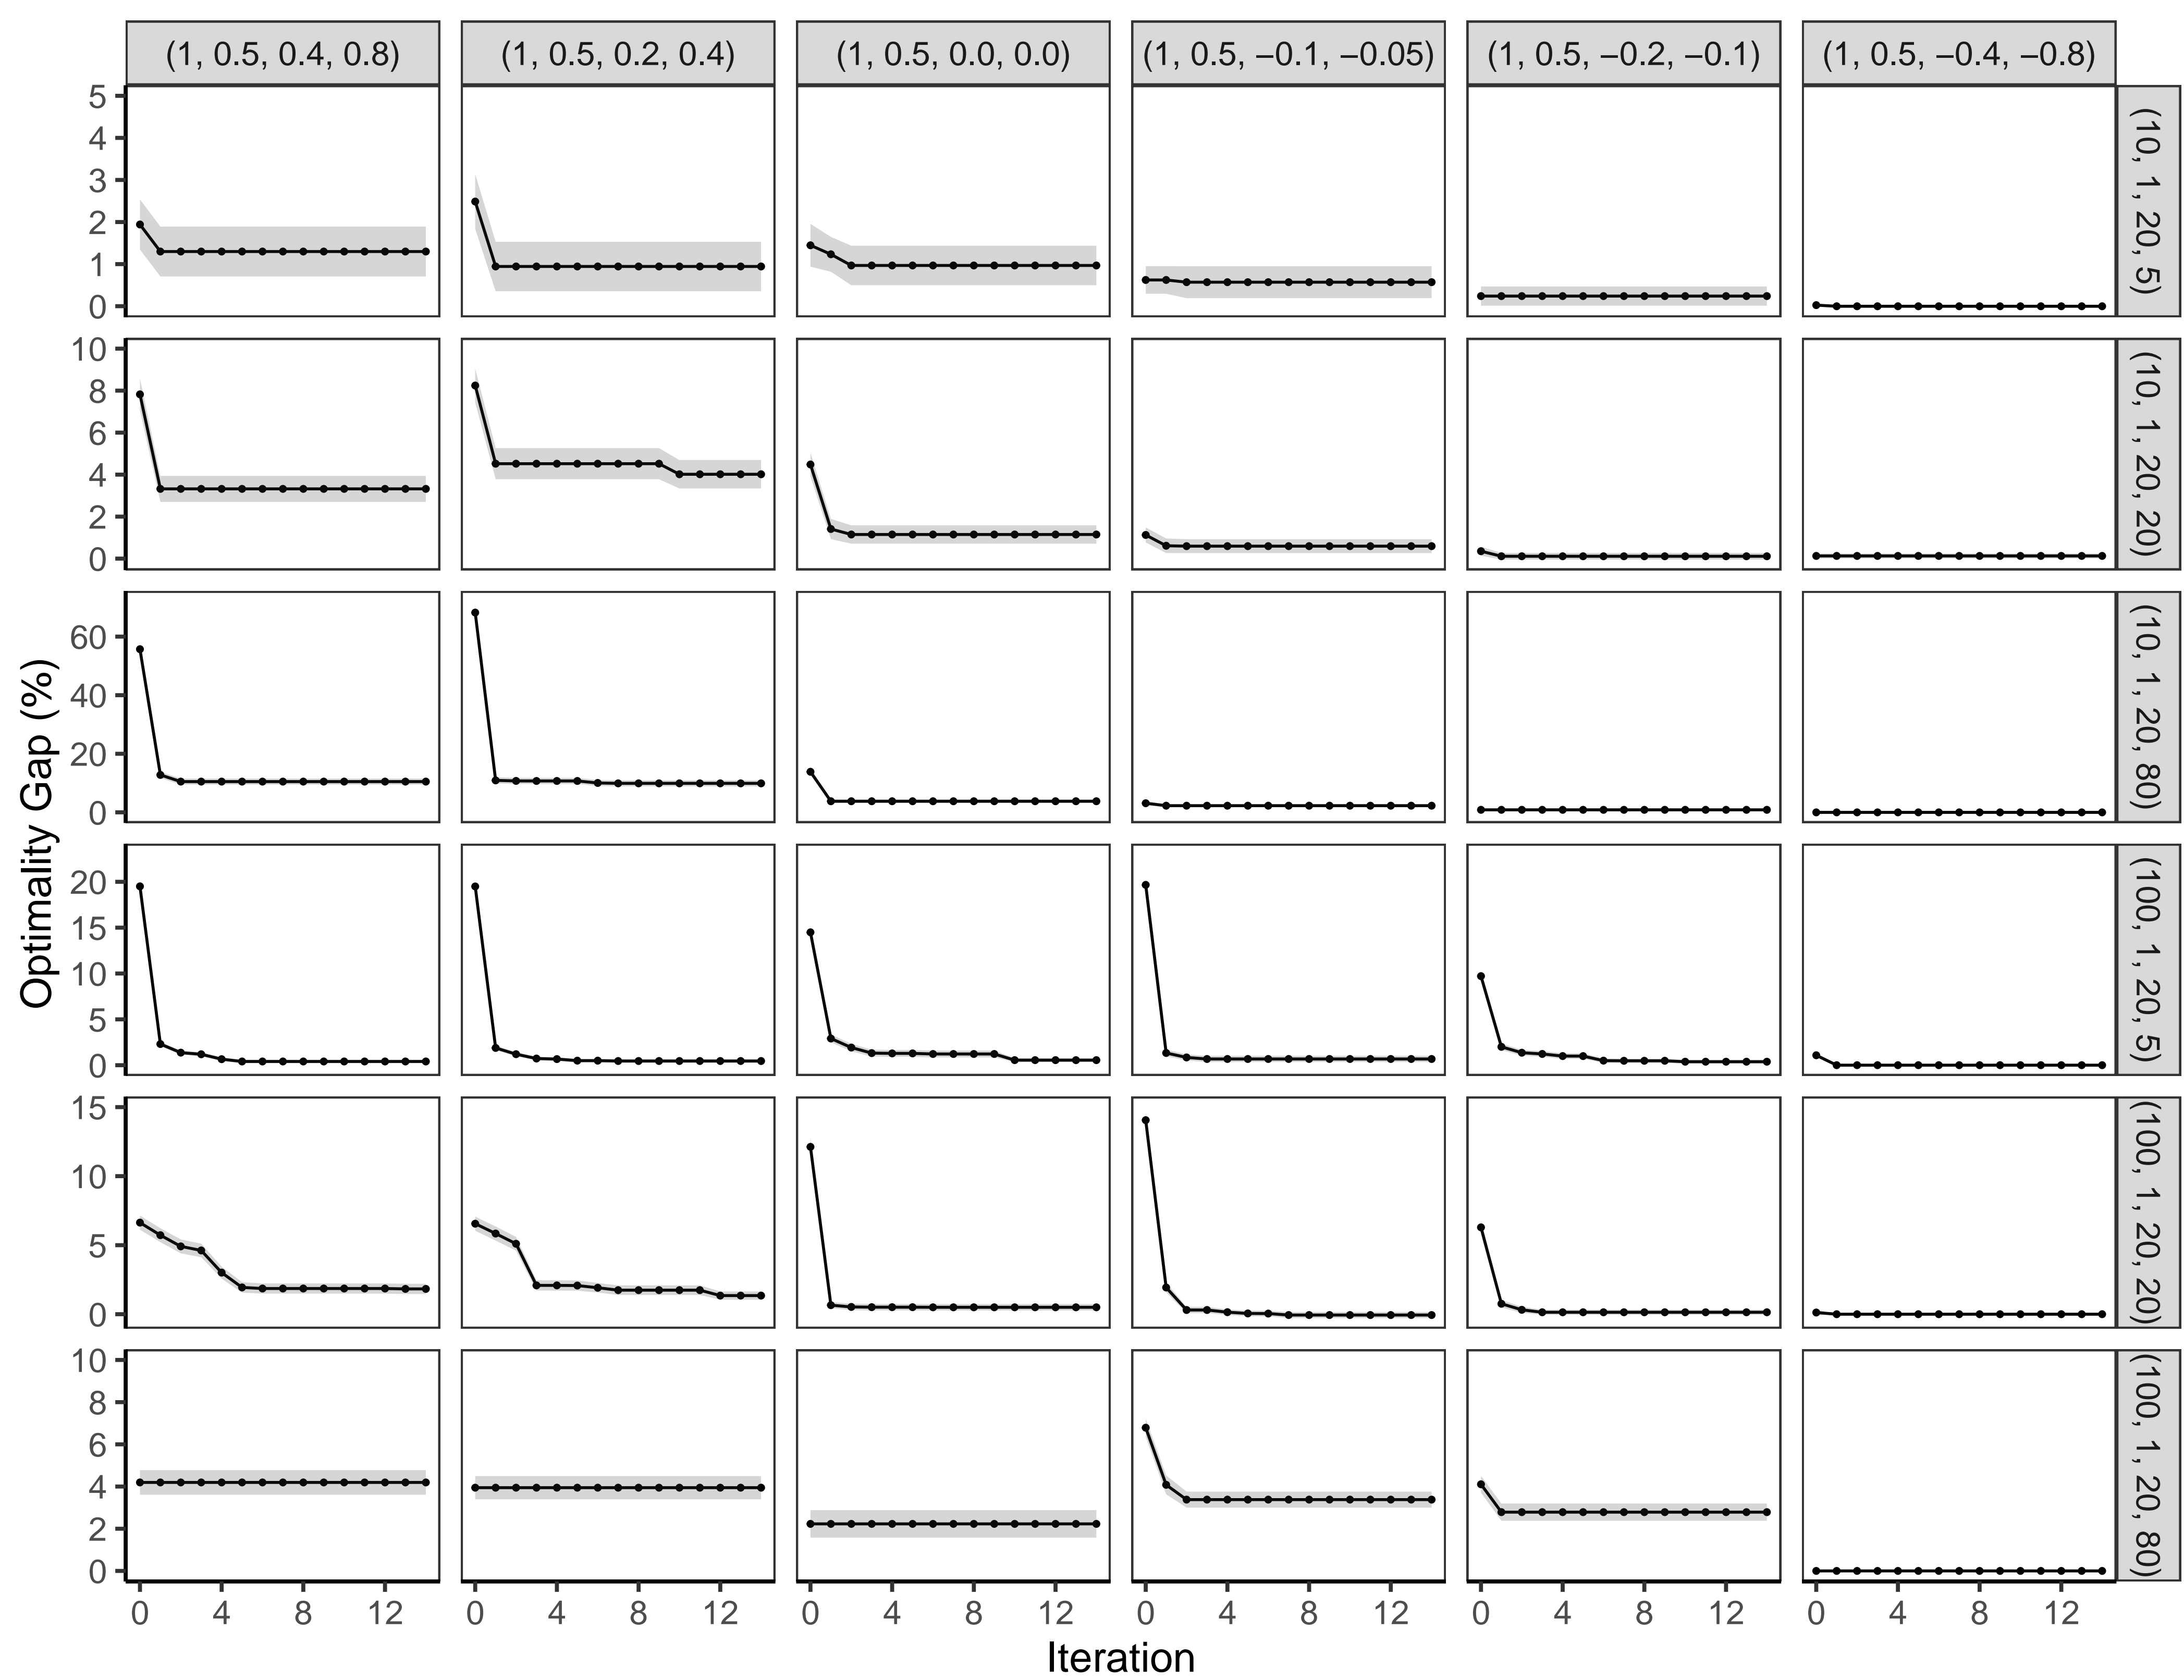

Supplement: ijoc.2023.0245.cd.zip [file Figure 4.pdf › 2023.0245-master/results/Figure 4.pdf]

Choice 2 Choice 3 Choice 4

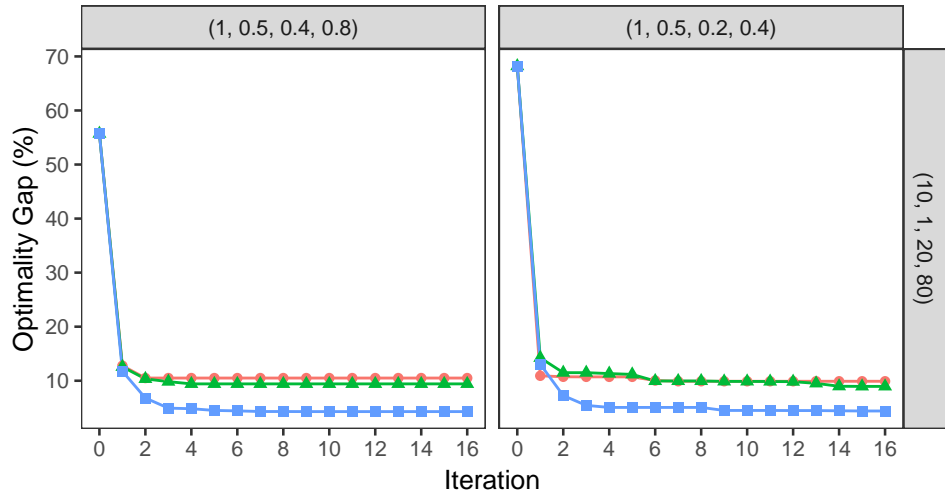

Supplement: ijoc.2023.0245.cd.zip [file Figure 5.pdf › 2023.0245-master/results/Figure 5.pdf]

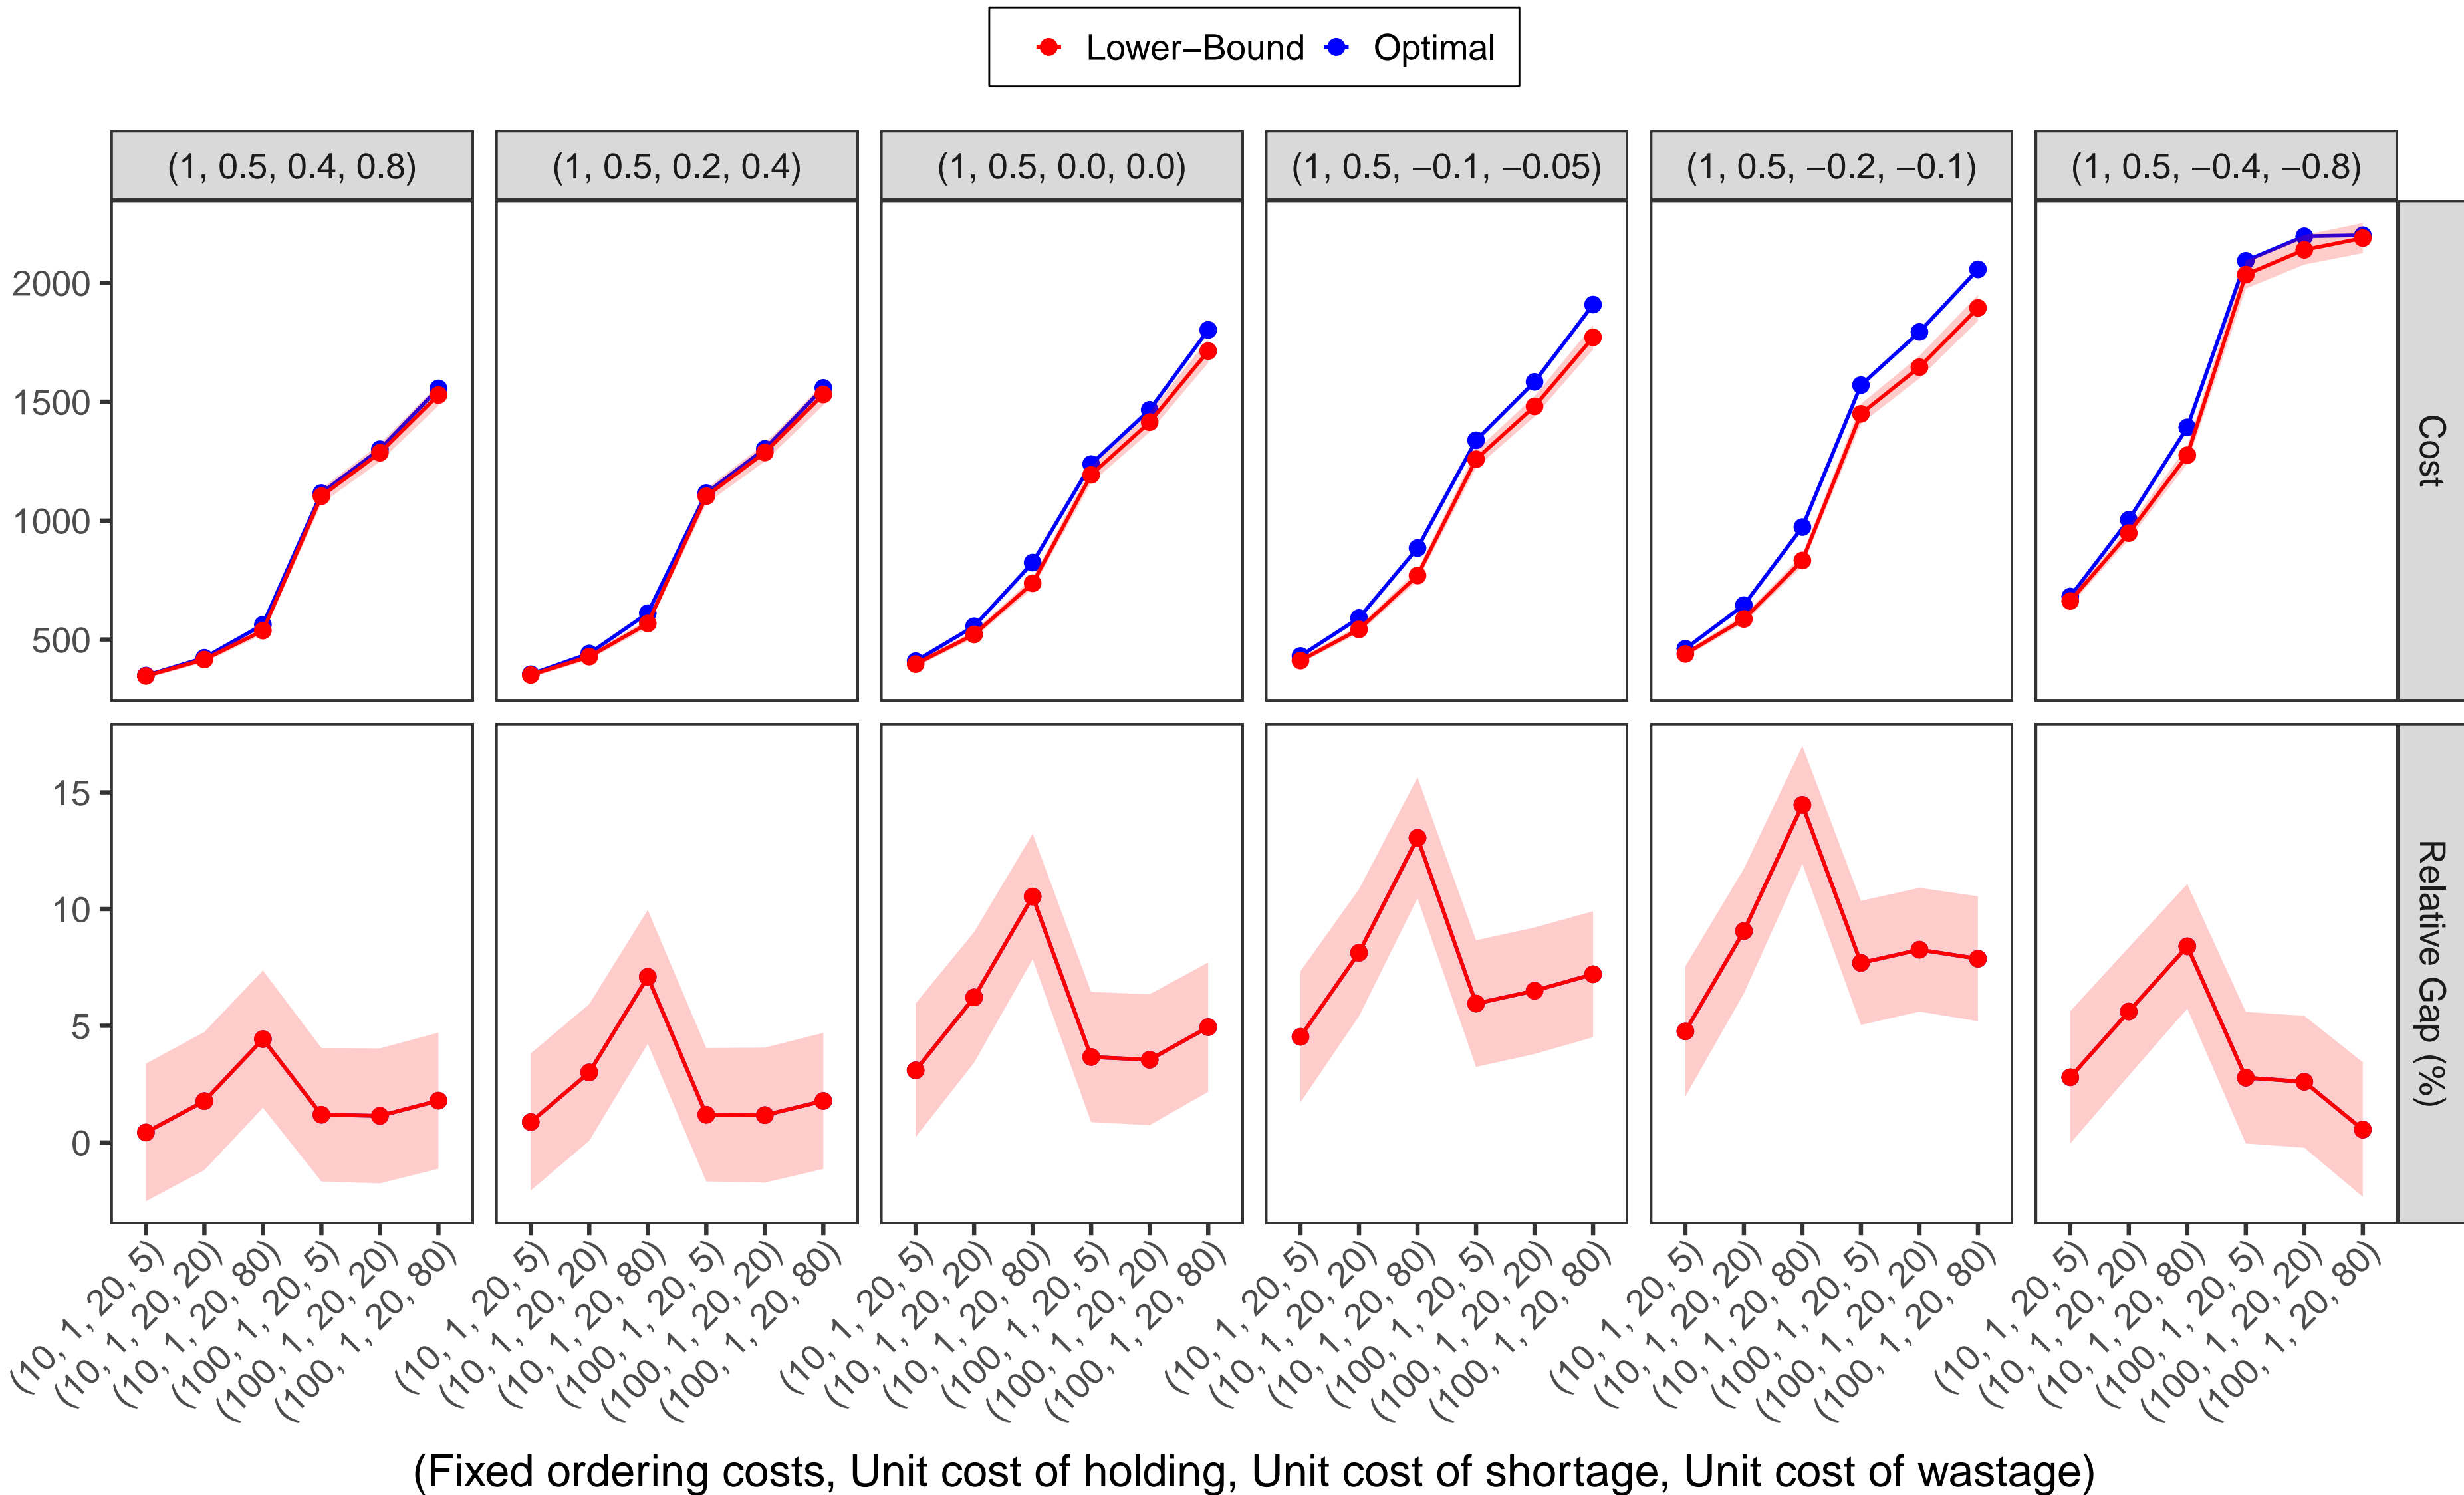

Supplement: ijoc.2023.0245.cd.zip [file Figure 6.pdf › 2023.0245-master/results/Figure 6.pdf]

Cost

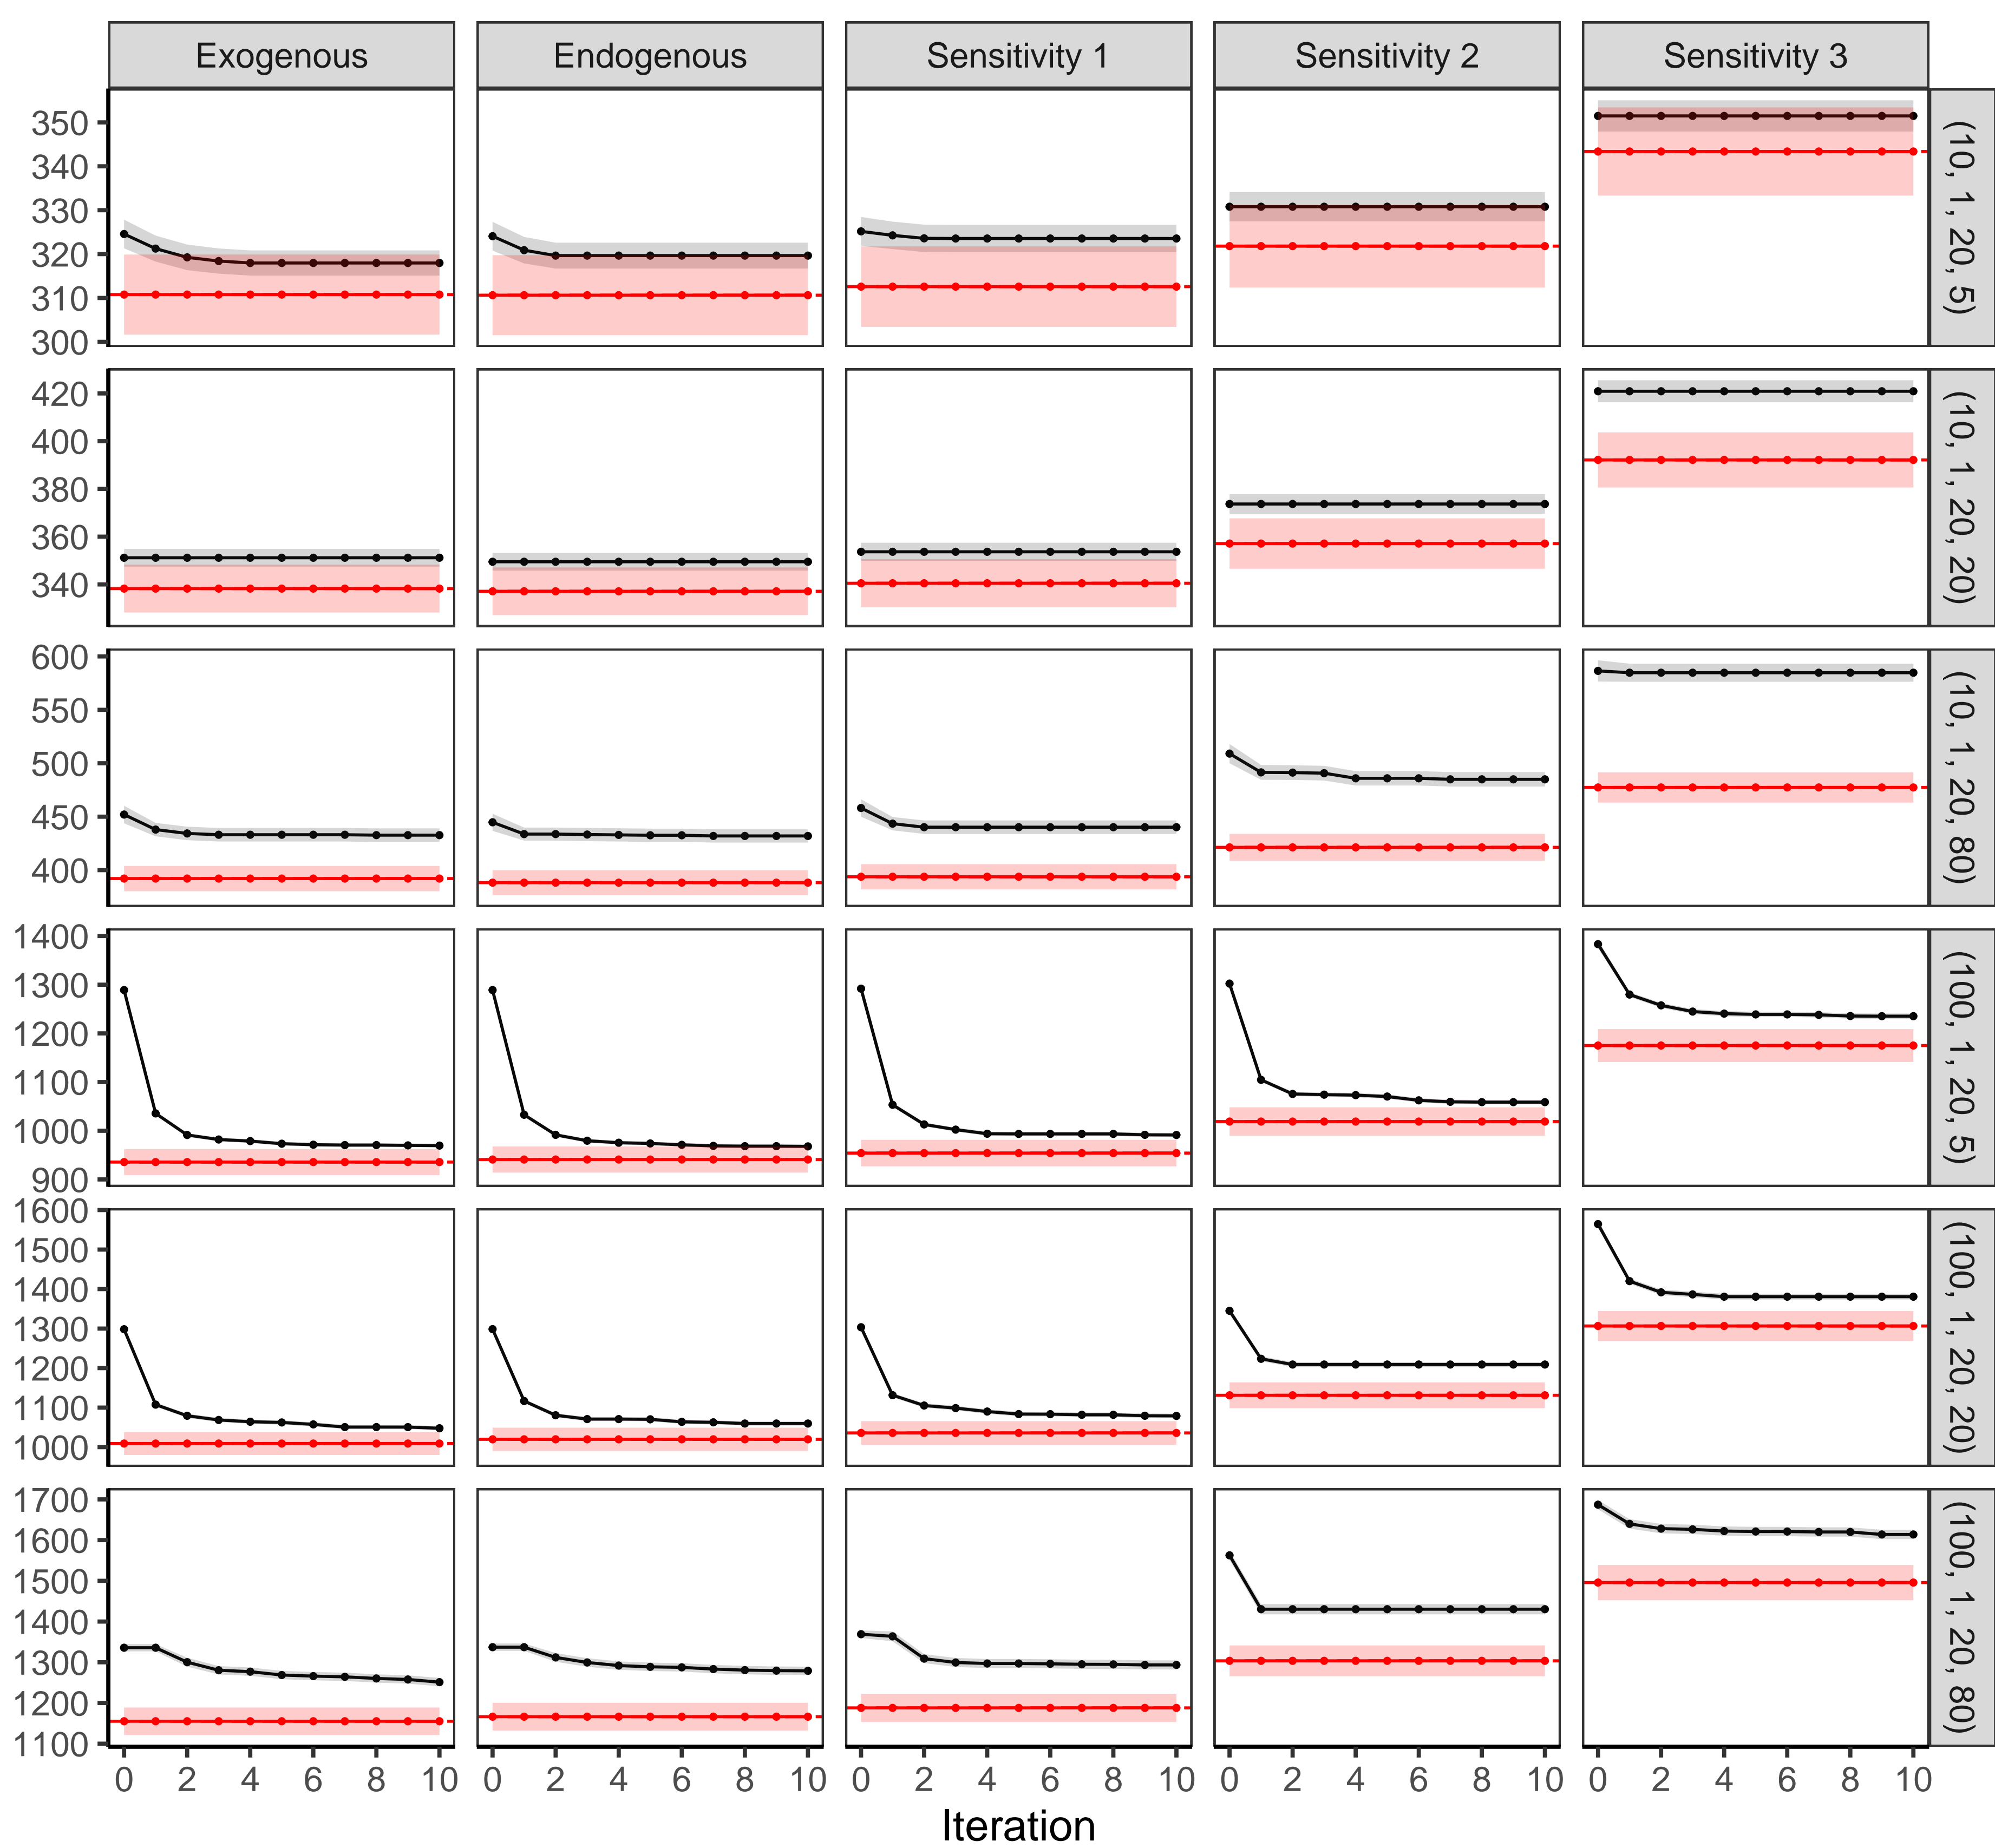

Supplement: ijoc.2023.0245.cd.zip [file Figure 7.pdf › 2023.0245-master/results/Figure 7.pdf]

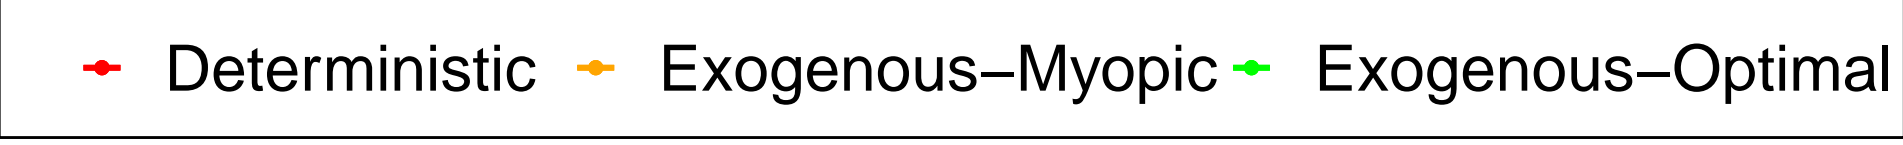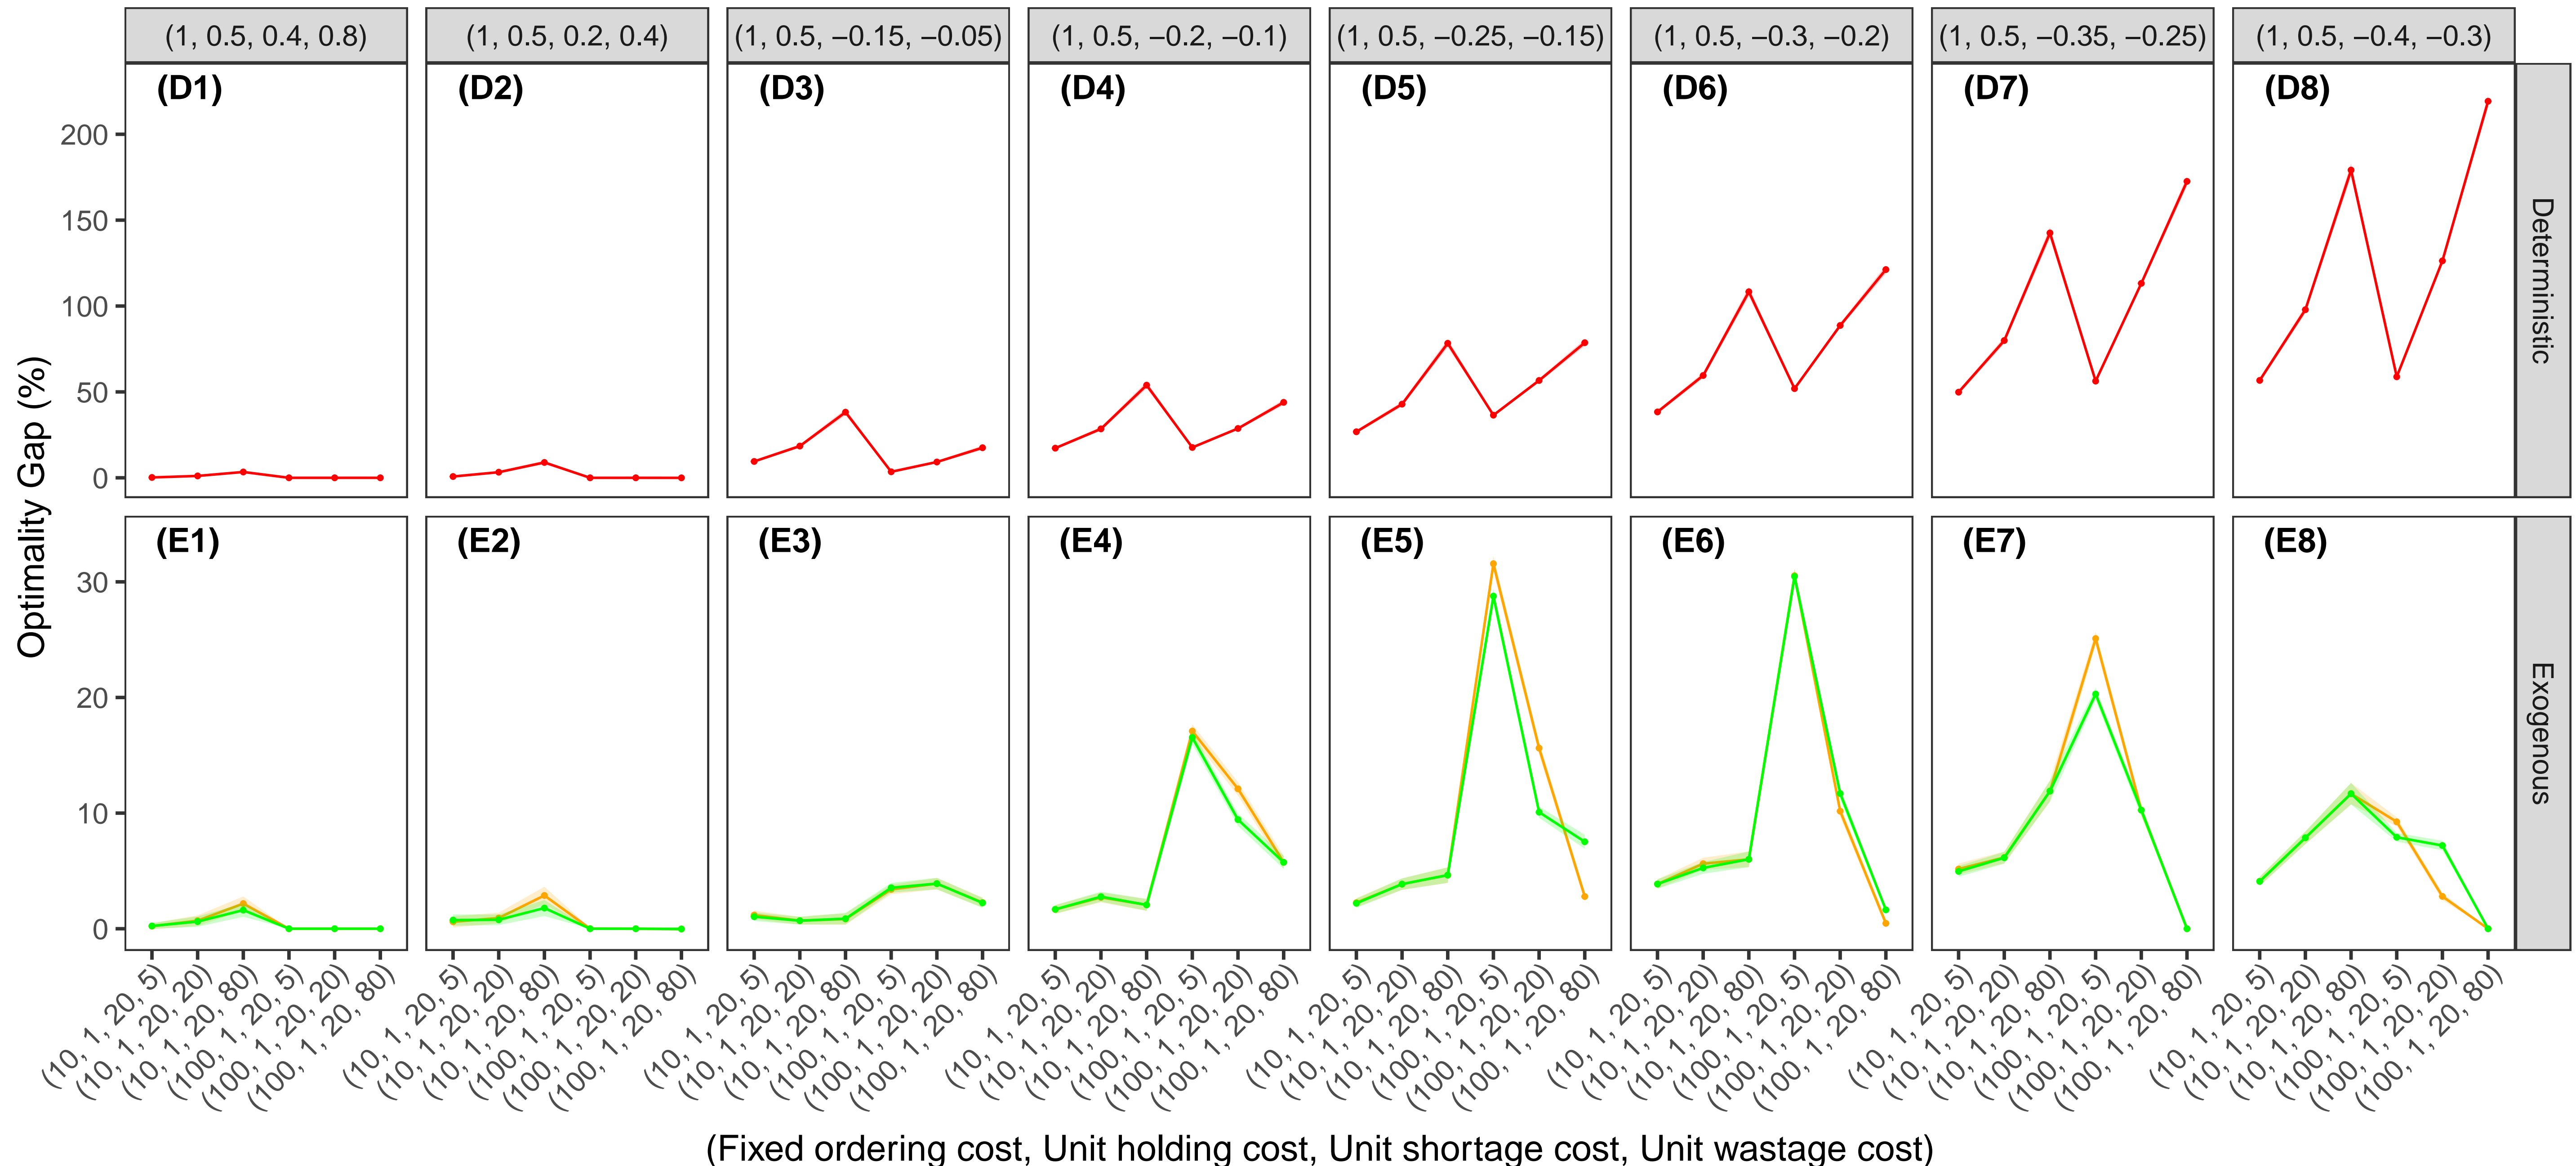

Supplement: ijoc.2023.0245.cd.zip [file Figure 8.pdf › 2023.0245-master/results/Figure 8.pdf]

Relative reduction in cost (%)

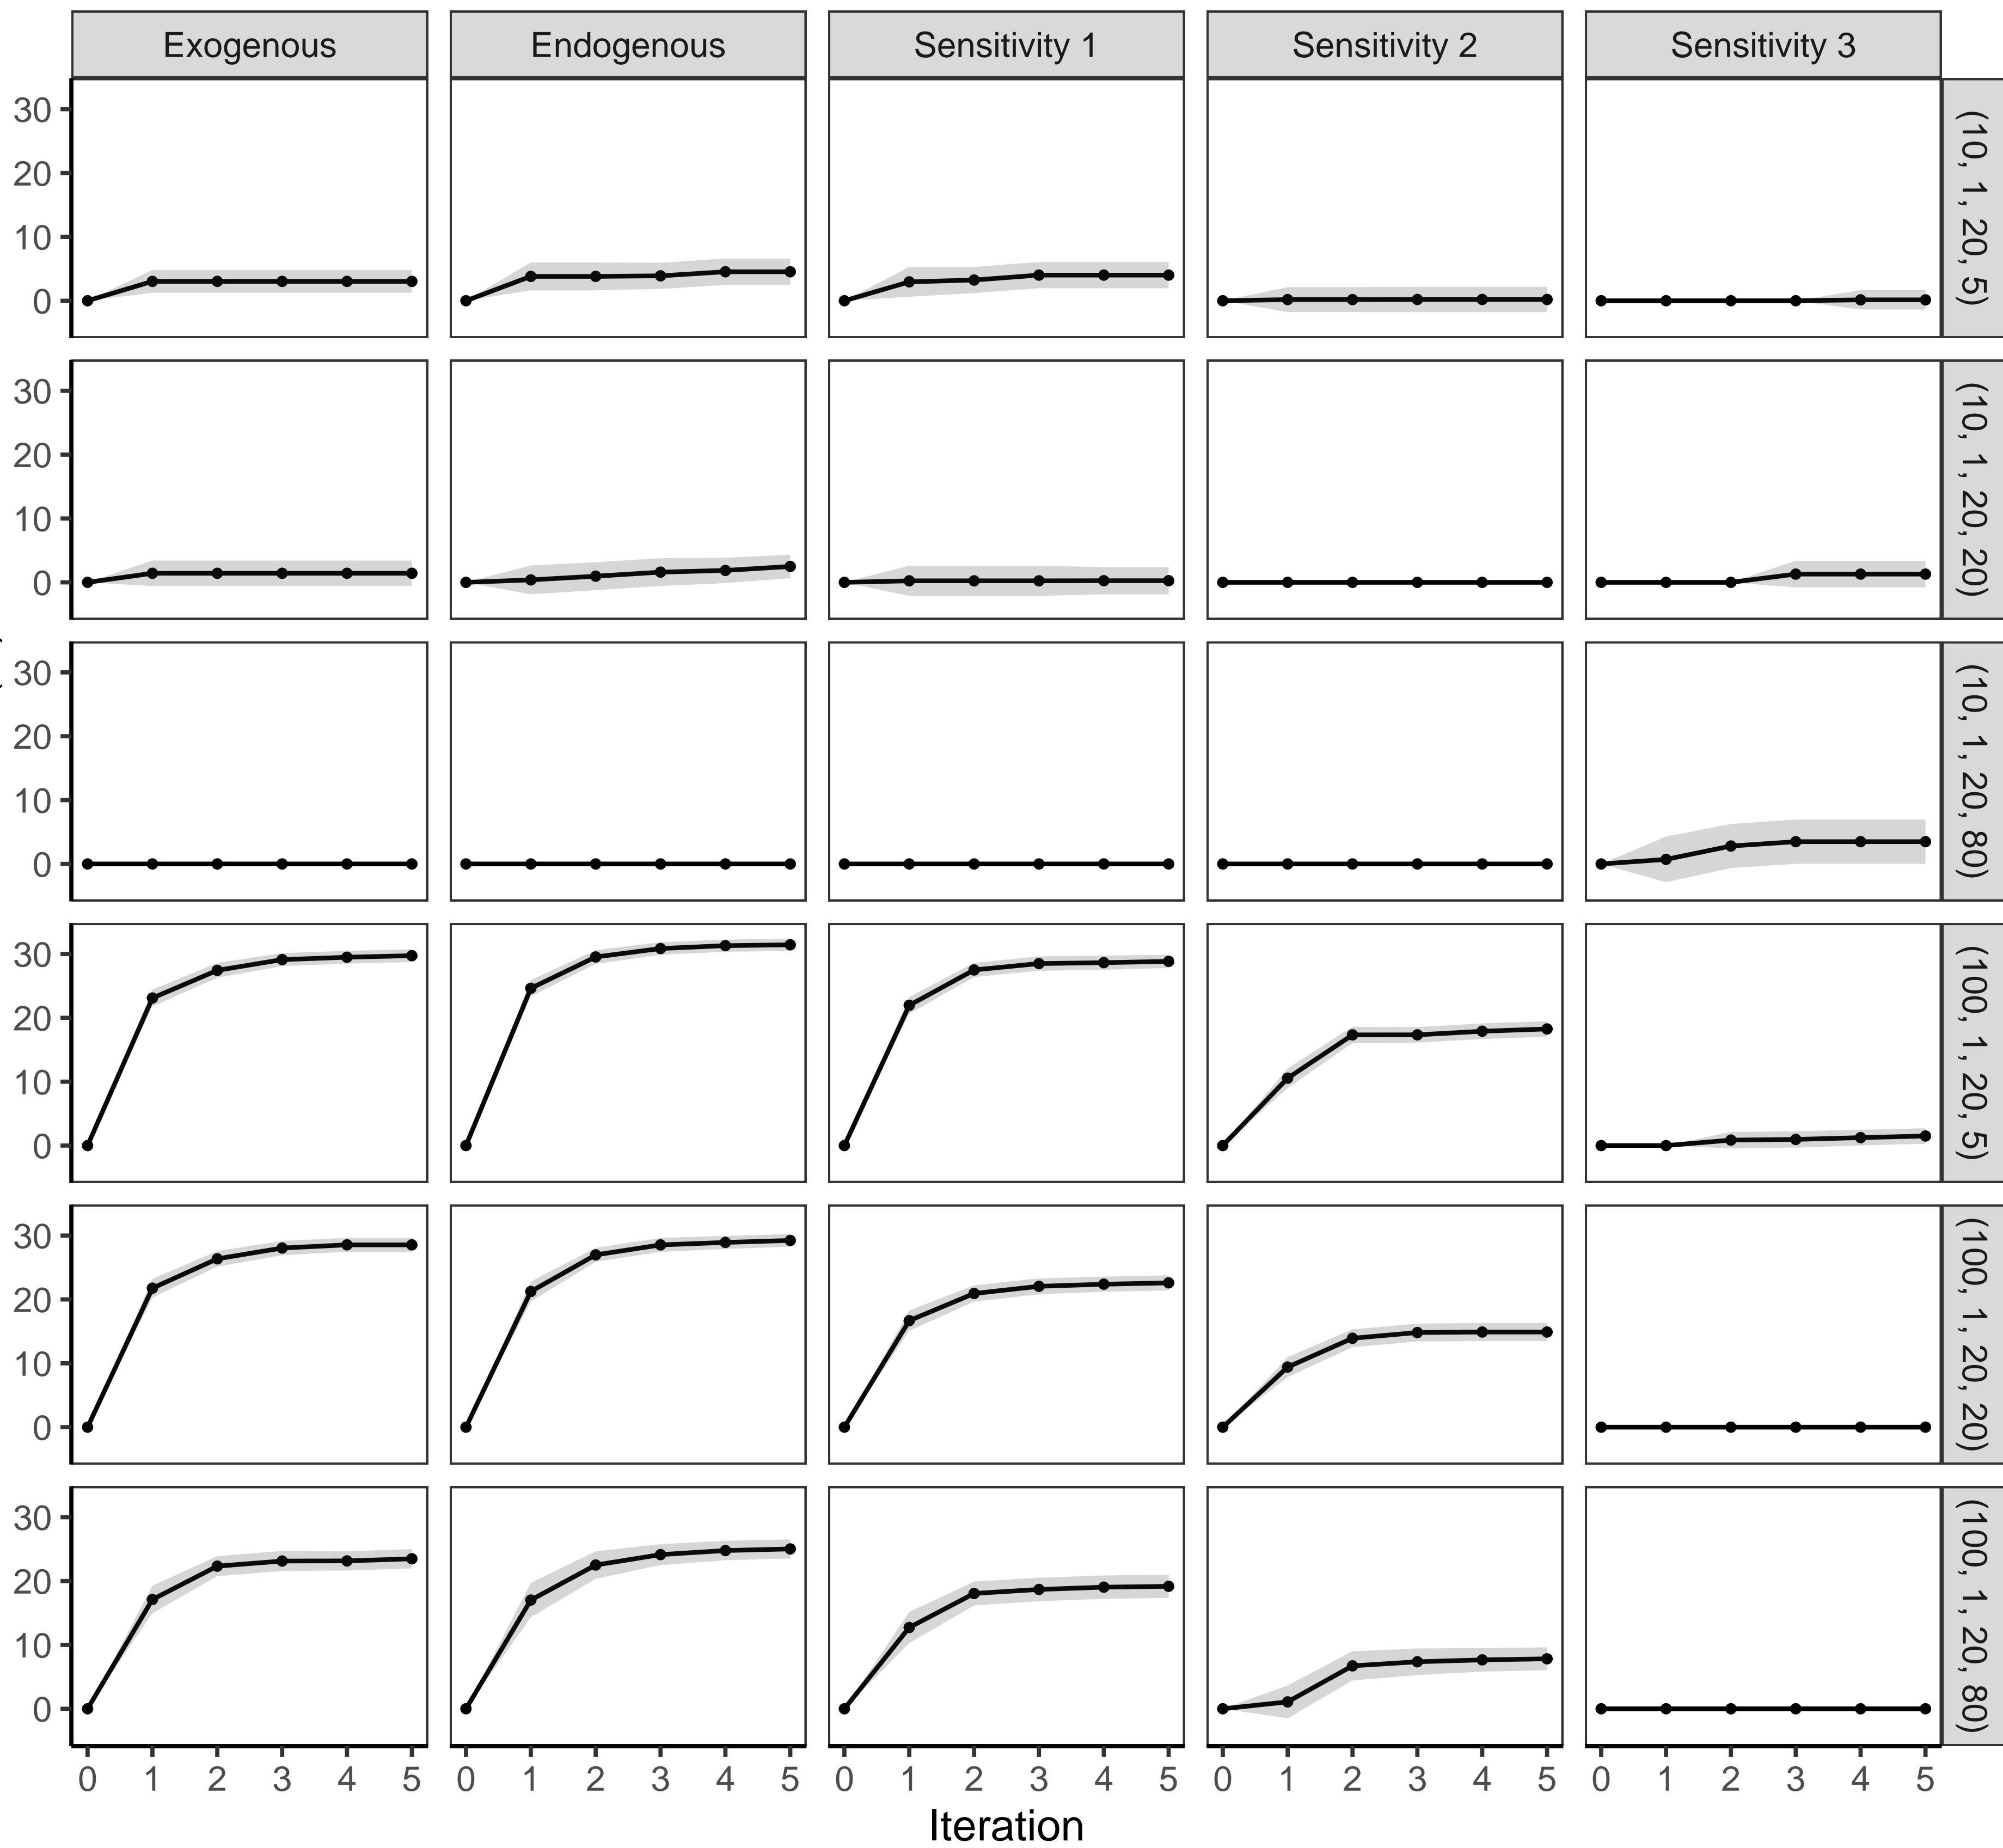

Supplement: ijoc.2023.0245.cd.zip [file Figure EC.1.pdf › 2023.0245-master/results/Figure EC.1.pdf]

M=20 M=30

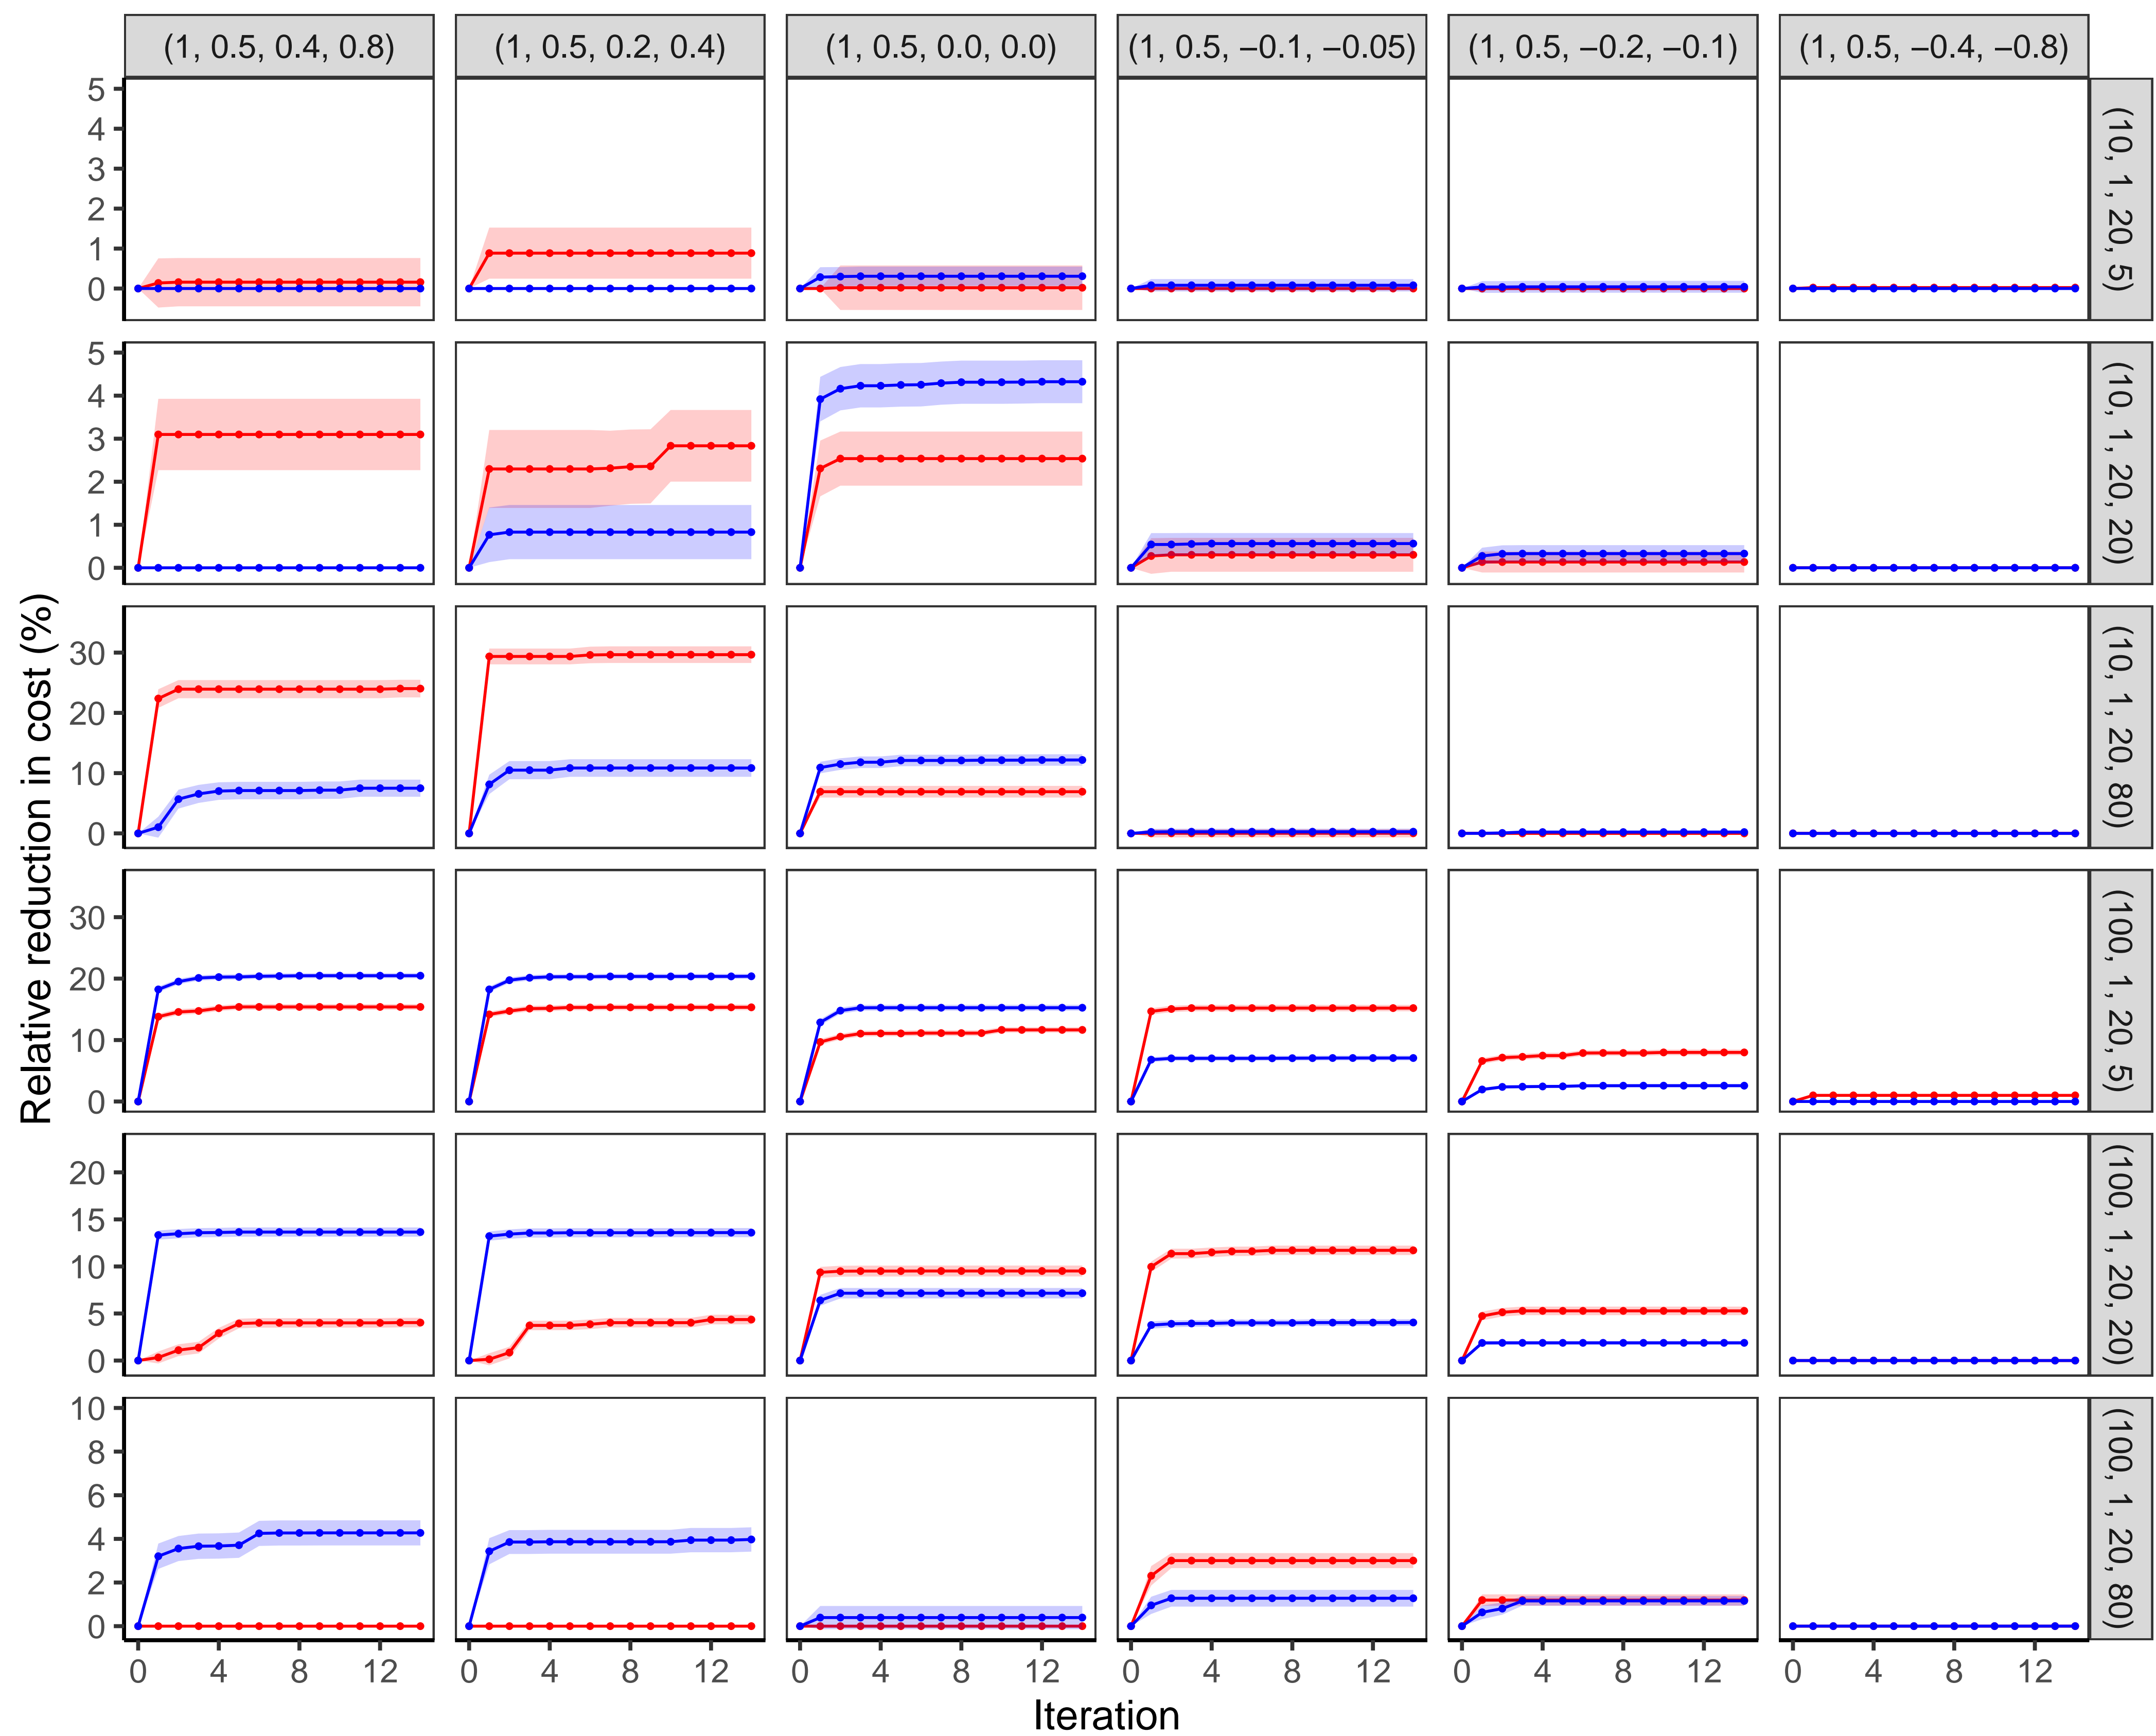

Supplement: ijoc.2023.0245.cd.zip [file Figure EC.2.pdf › 2023.0245-master/results/Figure EC.2.pdf]

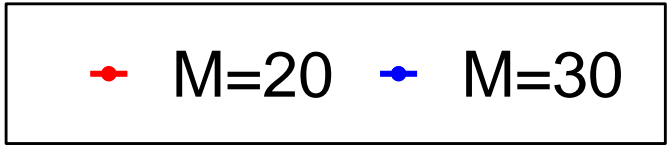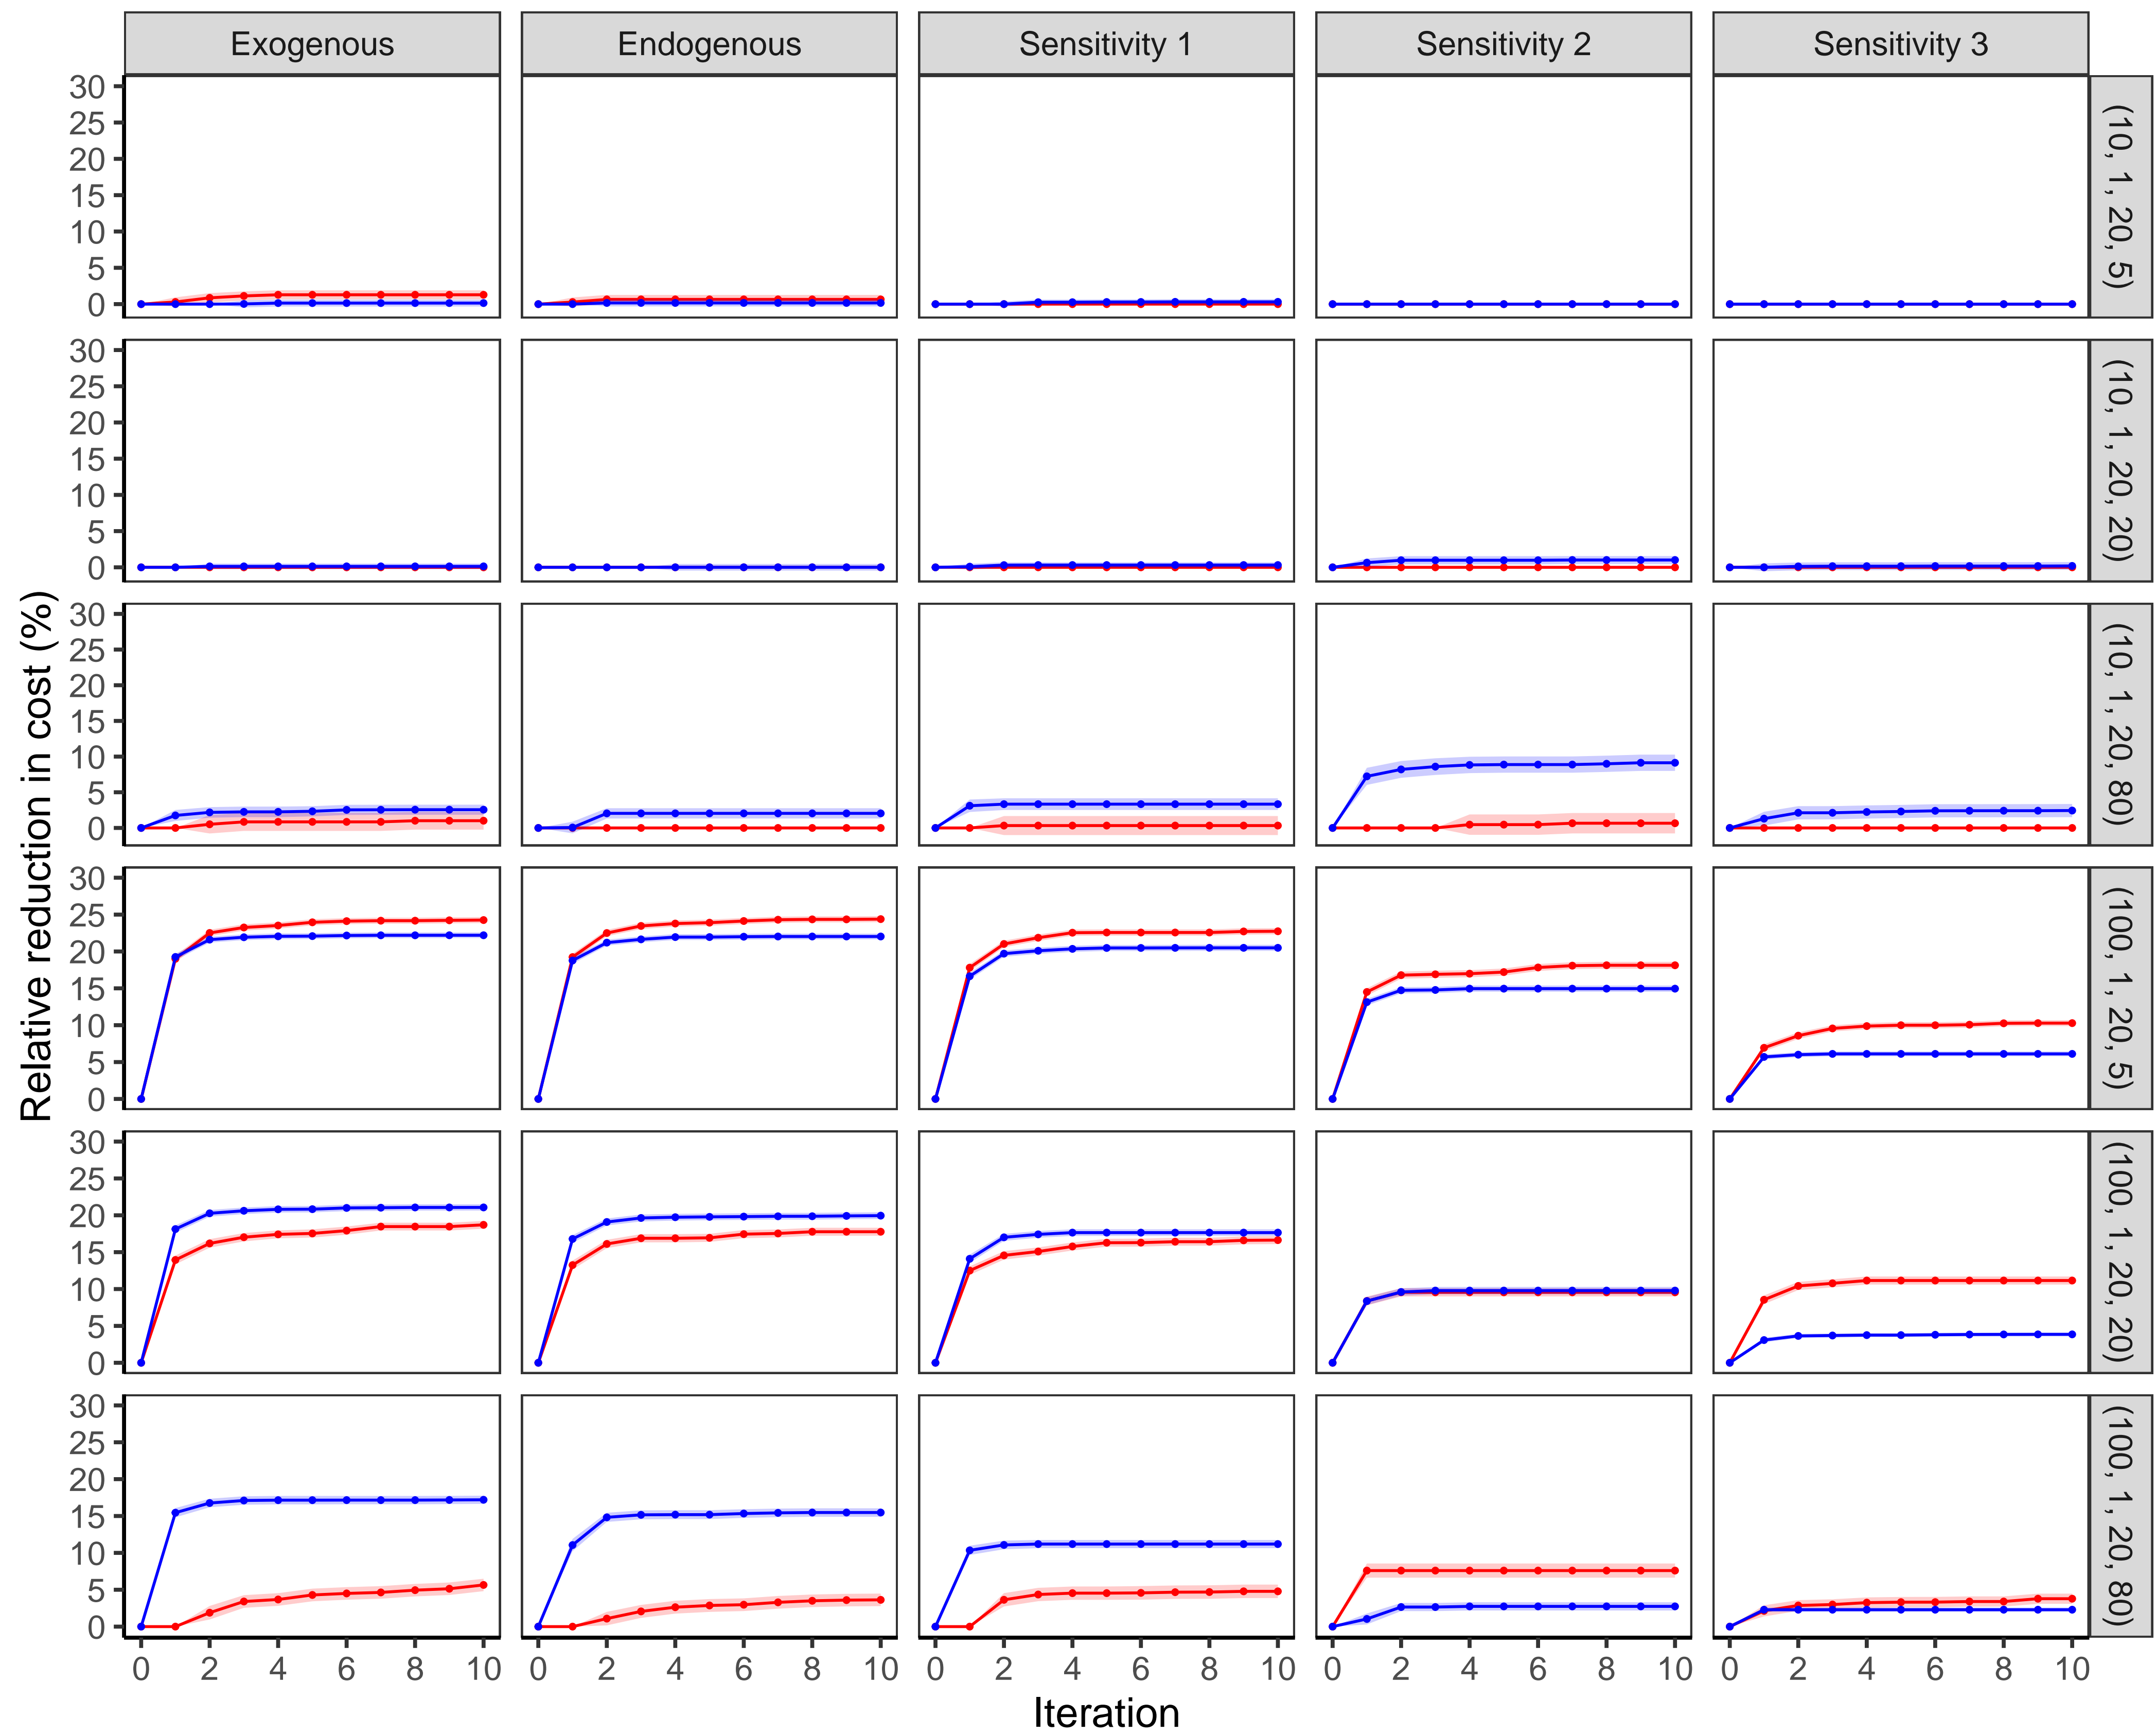

Supplement: ijoc.2023.0245.cd.zip [file Figure EC.3.pdf › 2023.0245-master/results/Figure EC.3.pdf]

■ Data ■ Multinomial Logistic Regression

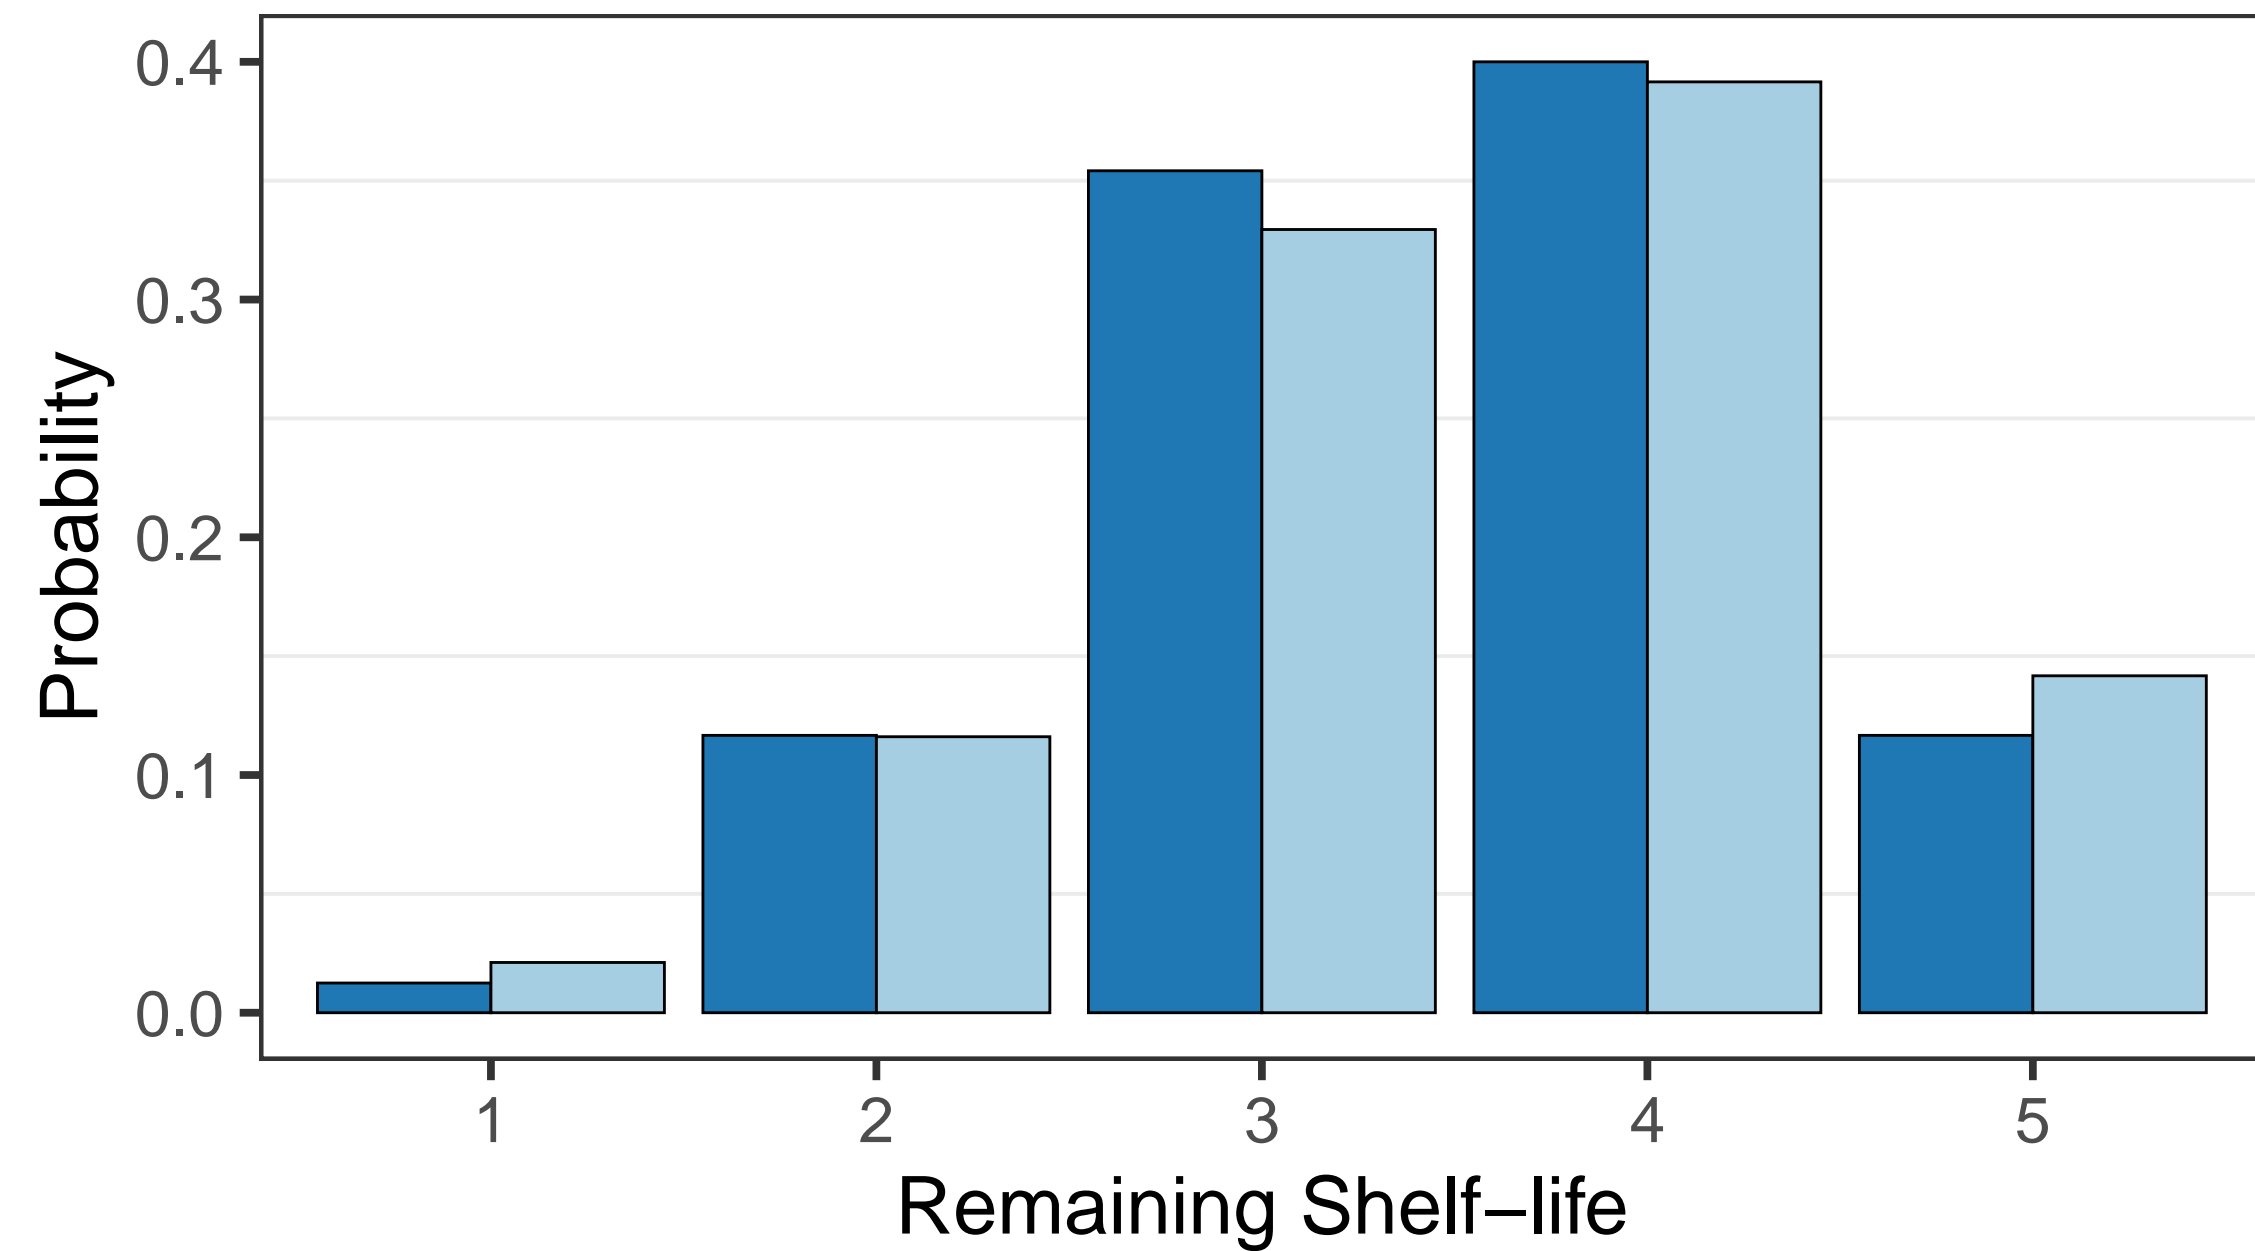

Supplement: ijoc.2023.0245.cd.zip [file Figure EC.6 (A).pdf › 2023.0245-master/results/Figure EC.6 (A).pdf]

■ Data ■ Multinomial Logistic Regression

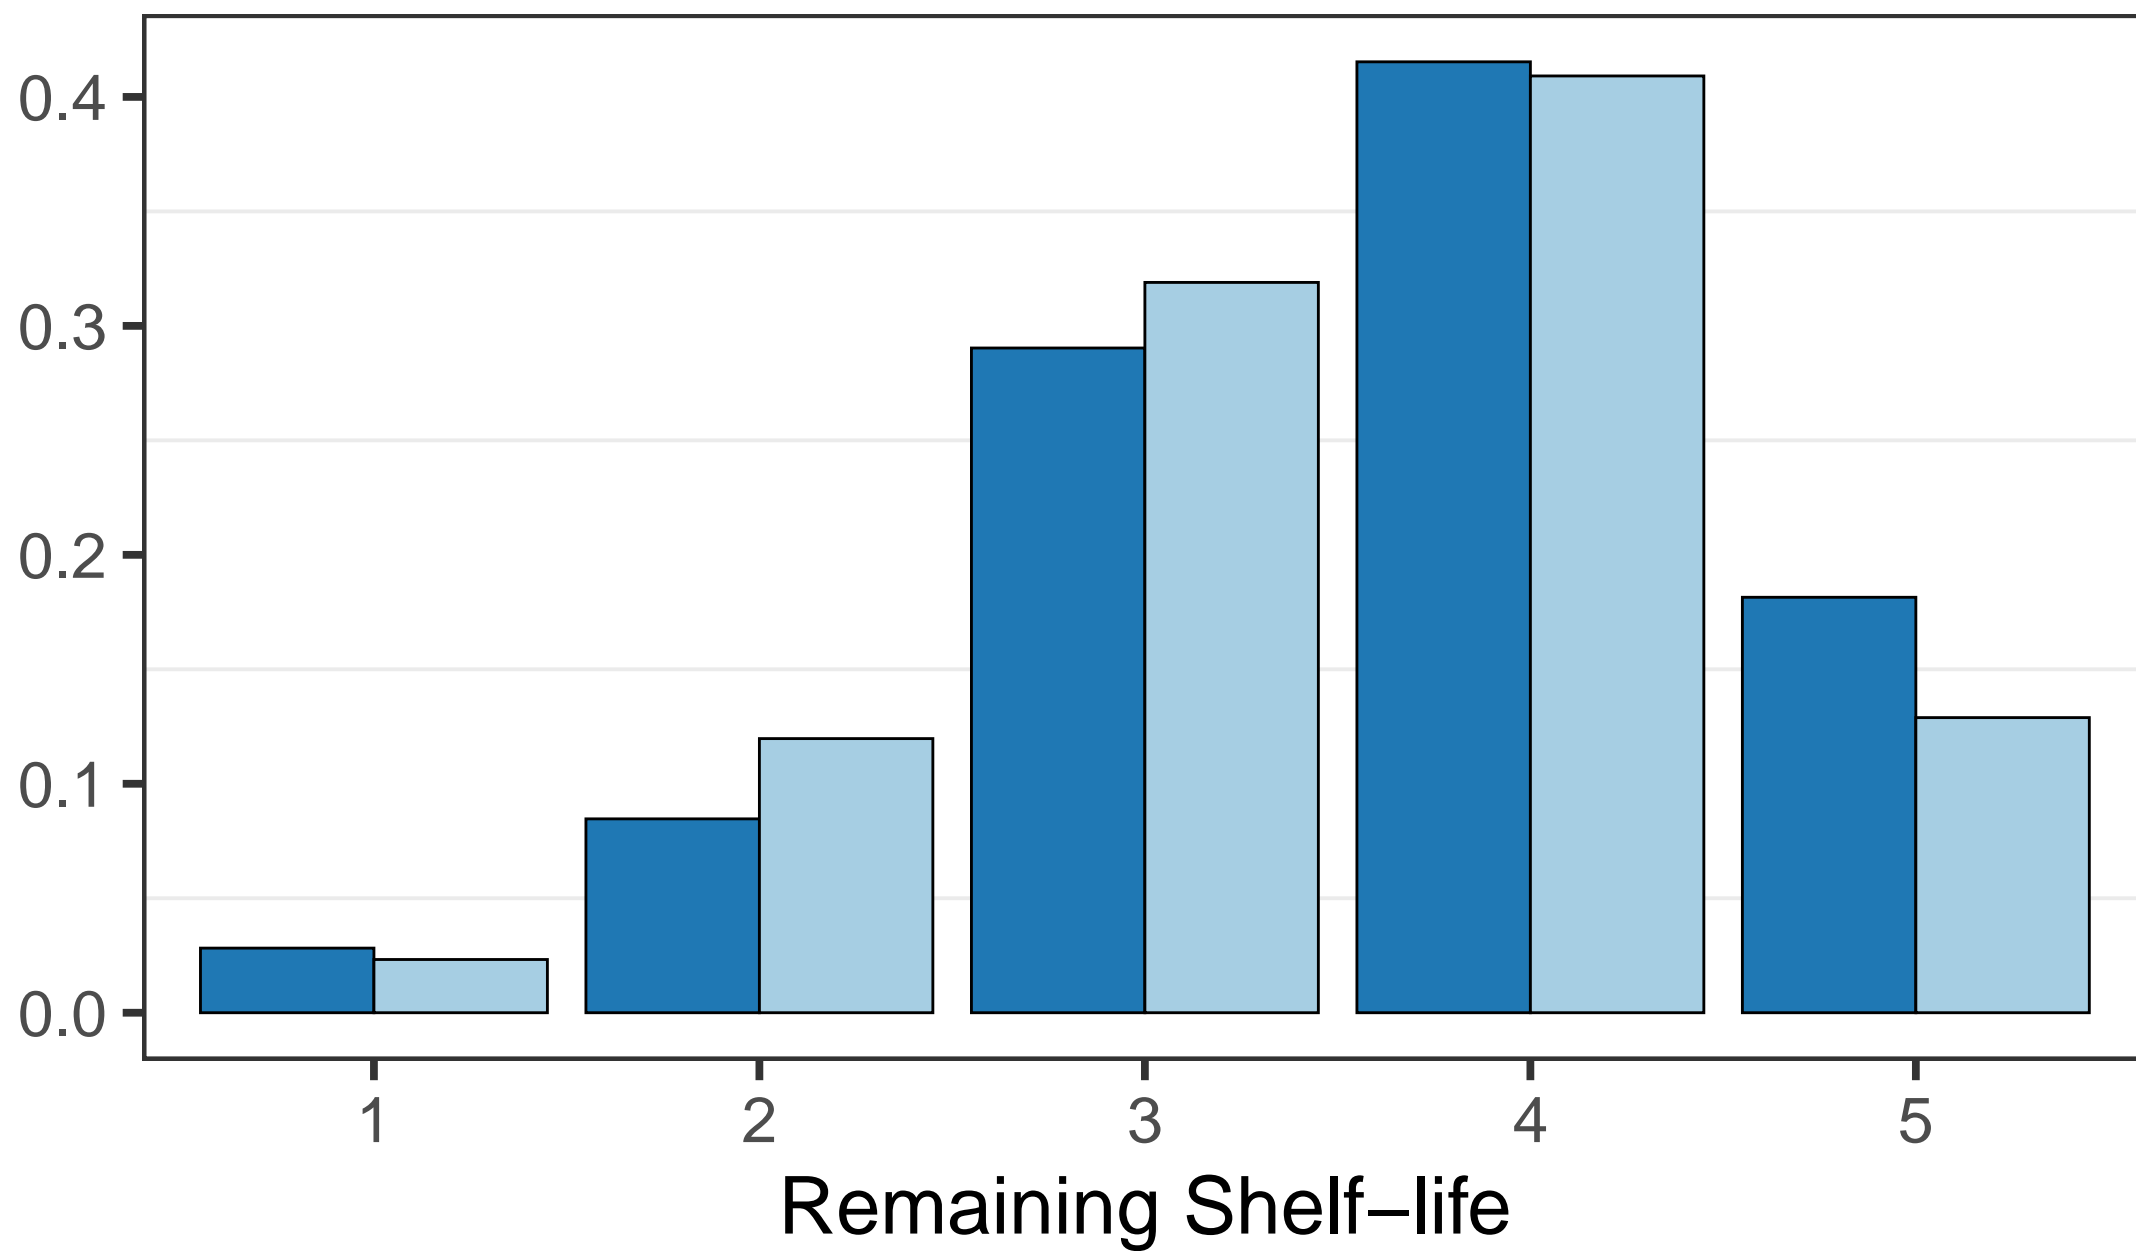

Supplement: ijoc.2023.0245.cd.zip [file Figure EC.6 (B).pdf › 2023.0245-master/results/Figure EC.6 (B).pdf]
